# Supplementary material for: Rh(III)-catalyzed chelation-assisted C–H activation/annulation of 2-arylimidazolines with cyclic diazo-1,3-dicarbonyl compounds: a novel approach to tetracyclic annulated derivatives of 2,3-dihydroimidazo[2,1-a]isoquinoline
Source: publisher site journal article supplement (doi:10.3762/bjoc.22.78), 2026-06-30
Supplement: Additional file 1 [file 1860-5397-22-78-S1.pdf]

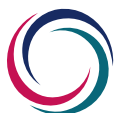

## Supporting Information

for

### **Rh(III)-catalyzed chelation-assisted C–H activation/annulation of 2-arylimidazolines with cyclic diazo-1,3-dicarbonyl compounds: a novel approach to tetracyclic annulated derivatives of 2,3-dihydroimidazo[2,1-*a*]isoquinoline**

Ivan Lyutin, Grigory Kantin, Olga Bakulina and Dmitry Dar'in

*Beilstein J. Org. Chem.* **2026**, 22, 997–1003. [doi:10.3762/bjoc.22.78](https://doi.org/10.3762/bjoc.22.78)

**Detailed experimental procedures for the preparation of compounds 2–4, analytical data for compounds 4a–q, copies of their NMR spectra, and X-ray crystallography data for compounds 4a and 4f**

## Table of contents

|                                                                      |     |
|----------------------------------------------------------------------|-----|
| 1. General information .....                                         | S2  |
| 2. Experimental procedures.....                                      | S3  |
| 2.1 Preparation of the imidazolines <b>2a-i</b> .....                | S3  |
| 2.2 Preparation of diazo compounds <b>3a-m</b> .....                 | S3  |
| 2.3 Preparation of imidazoisquinolines <b>4a-q</b> .....             | S4  |
| 2. Copies of NMR spectra .....                                       | S12 |
| 3. Crystallographic data for compounds <b>4a</b> and <b>4f</b> ..... | S33 |
| 4. References .....                                                  | S35 |

## 1. General information

**Solvents:** Unless otherwise indicated, solvents were obtained from commercial suppliers. Dichloromethane (DCM) was dried by distillation from P<sub>2</sub>O<sub>5</sub> and stored over molecular sieves (4 Å).

**Reagents:** Unless otherwise indicated, reagents were used as purchased from commercial suppliers. [RhCp\*Cl<sub>2</sub>]<sub>2</sub> was obtained from RhCl<sub>3</sub> and 1,2,3,4,5-pentamethylcyclopentadiene according to the previously published protocol<sup>1</sup>.

**Nuclear magnetic resonance spectroscopy:** NMR spectroscopic data were recorded with a Bruker Avance III 400 MHz spectrometer (400.13 MHz for <sup>1</sup>H and NOESY 100.61 MHz for <sup>13</sup>C{<sup>1</sup>H} and 376.50 MHz for <sup>19</sup>F{<sup>1</sup>H}), and with a Bruker Avance III 500 MHz spectrometer (125.73 MHz for <sup>13</sup>C{<sup>1</sup>H}) in CDCl<sub>3</sub> and DMSO-*d*<sub>6</sub> and were referenced to residual solvent proton signals ( $\delta_{\text{H}} = 7.26$  and 2.50 ppm, respectively) and solvent carbon signals ( $\delta_{\text{C}} = 77.16$  and 39.52 ppm, respectively).

**Melting points:** Melting points were determined with a melting point apparatus REACH Devices RD-MP in the open capillary tubes.

**Mass spectrometry:** HRMS were recorded using a microOTOF-Q spectrometer (Bruker); ionization by electrospray, positive detection.

**X-ray crystallography:** Single crystal X-ray data were obtained using an Agilent Technologies SuperNova Atlas and an Agilent Technologies Xcalibur Eos diffractometers at a temperature of 100 K.

**Thin layer chromatography:** Thin layer chromatography (TLC) was performed on aluminum-backed pre-coated plates with silica gel 60 F<sub>254</sub> with a suitable solvent system and was visualized using UV fluorescence.

**Column chromatography:** Column chromatography was carried out with silica gel grade 60 (0.040–0.063 mm) 230–400 mesh using Biotage Isolera Prime instrument.

**Heating:** An aluminum heating block was used to maintain the temperature of the reaction mixtures.

## 2. Experimental procedures

### 2.1 Preparation of the imidazolines 2a–i

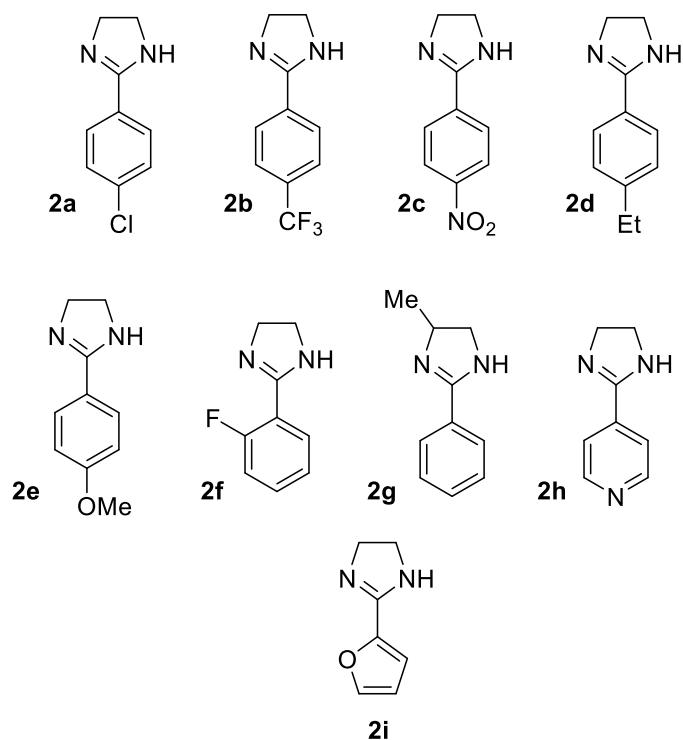

Imidazolines **2a–i** were prepared according to the common protocol for condensation of equimolar amounts of diamine and arylaldehyde in dry DCM overnight at rt in the presence of NBS.<sup>2</sup>

### 2.2 Preparation of diazo compounds 3a–m

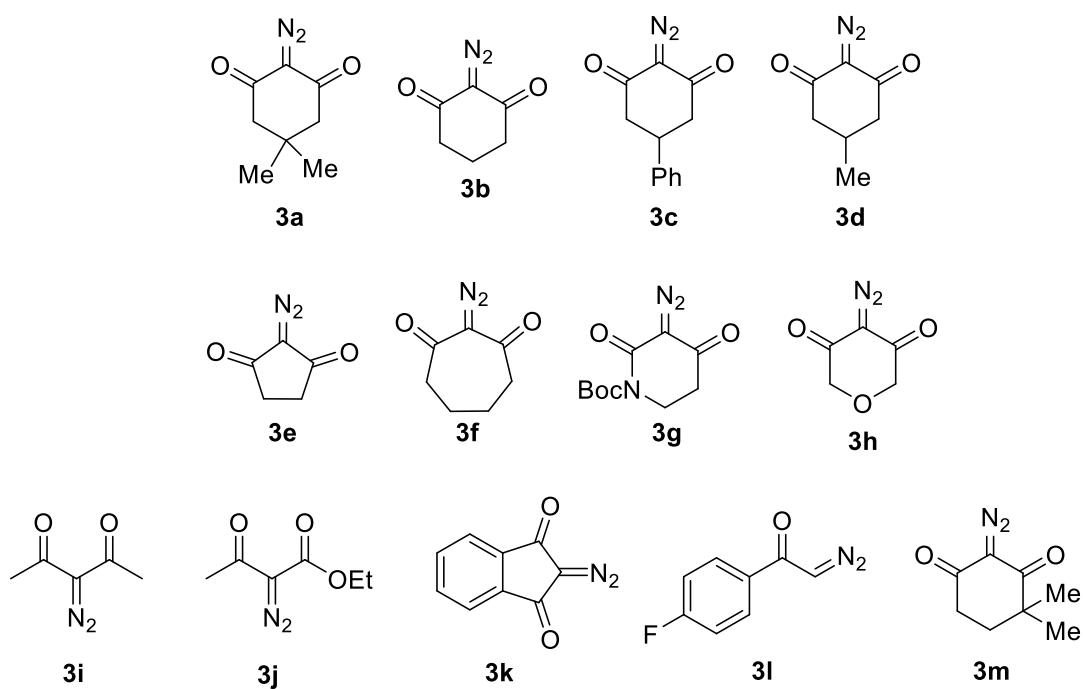

The diazo compounds **3a–m** were obtained as described previously.<sup>3</sup>

## 2.3 Mechanism studies

### Preparation of rhodocycle **5**

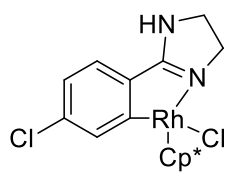

**5**

2-Arylimidazoline **2a** (0.14 mmol),  $[\text{RhCp}^*\text{Cl}_2]_2$  (0.07 mmol), NaOAc (6.0 equiv), and DCM (2 mL) were charged into a pressure tube. The reaction mixture was stirred at room temperature for 12 h. After filtration, the solvent was removed under reduced pressure and the residue was washed with  $\text{Et}_2\text{O}$  for several times to afford the complex **5**. Yield: 22 mg, 35%.  $^1\text{H}$  NMR (400 MHz,  $\text{CDCl}_3$ )  $\delta$  7.75 – 7.66 (m, 1H), 7.34 – 7.25 (m, 1H), 6.97 – 6.90 (m, 1H), 6.61 (s, 1H), 3.89 – 3.77 (m, 1H), 3.67 – 3.52 (m, 1H), 3.34 – 3.22 (m, 1H), 2.25 – 2.12 (m, 1H), 1.63 (s, 15H).  $^{13}\text{C}$  NMR (101 MHz,  $\text{CDCl}_3$ )  $\delta$  180.2, 171.8 (d,  $J = 3.3$  Hz), 135.7, 135.7 (d,  $J = 1.7$  Hz), 134.3, 126.0, 122.1, 94.8 (d,  $J = 6.5$  Hz), 51.8, 44.1, 9.5.

### $^1\text{H}$ and $^{13}\text{C}$ NMR of complex

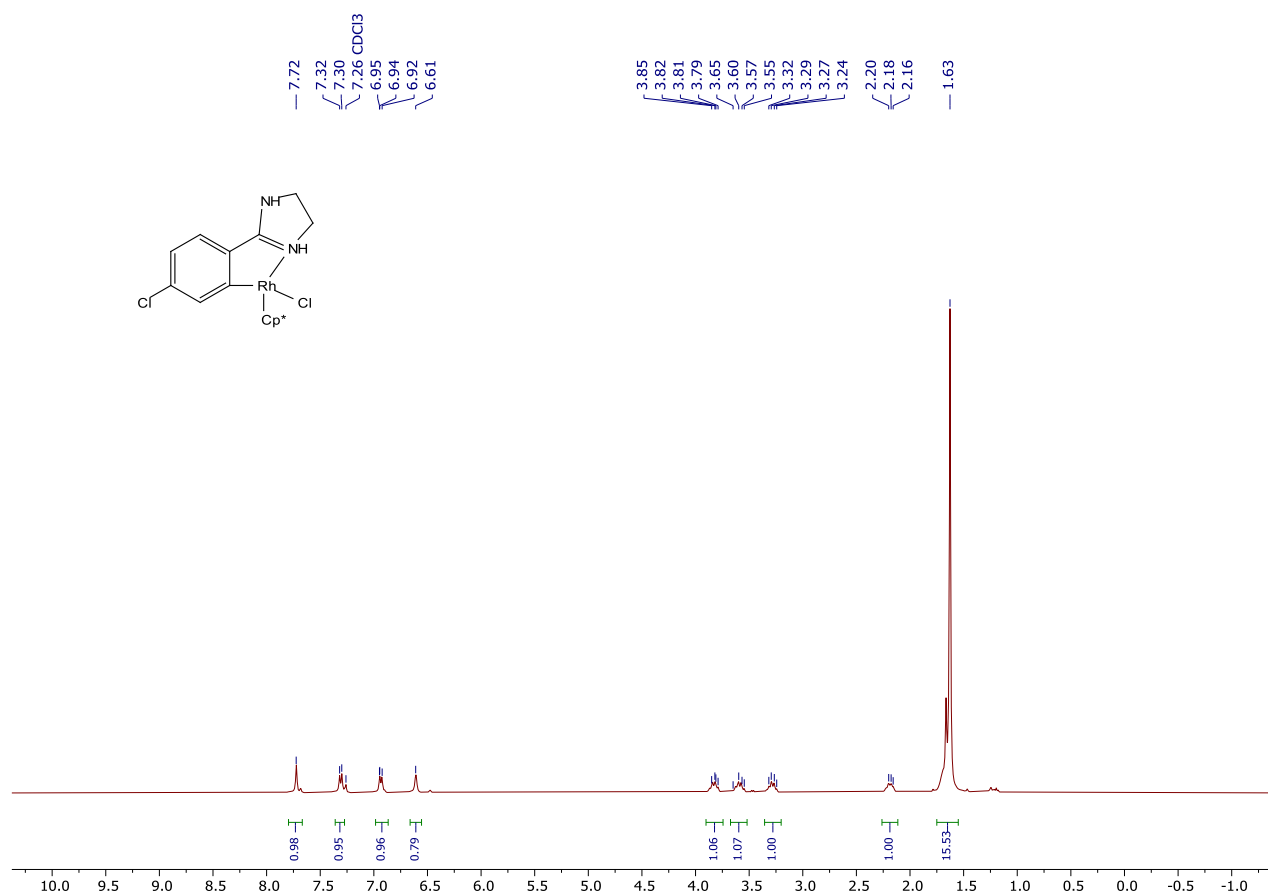

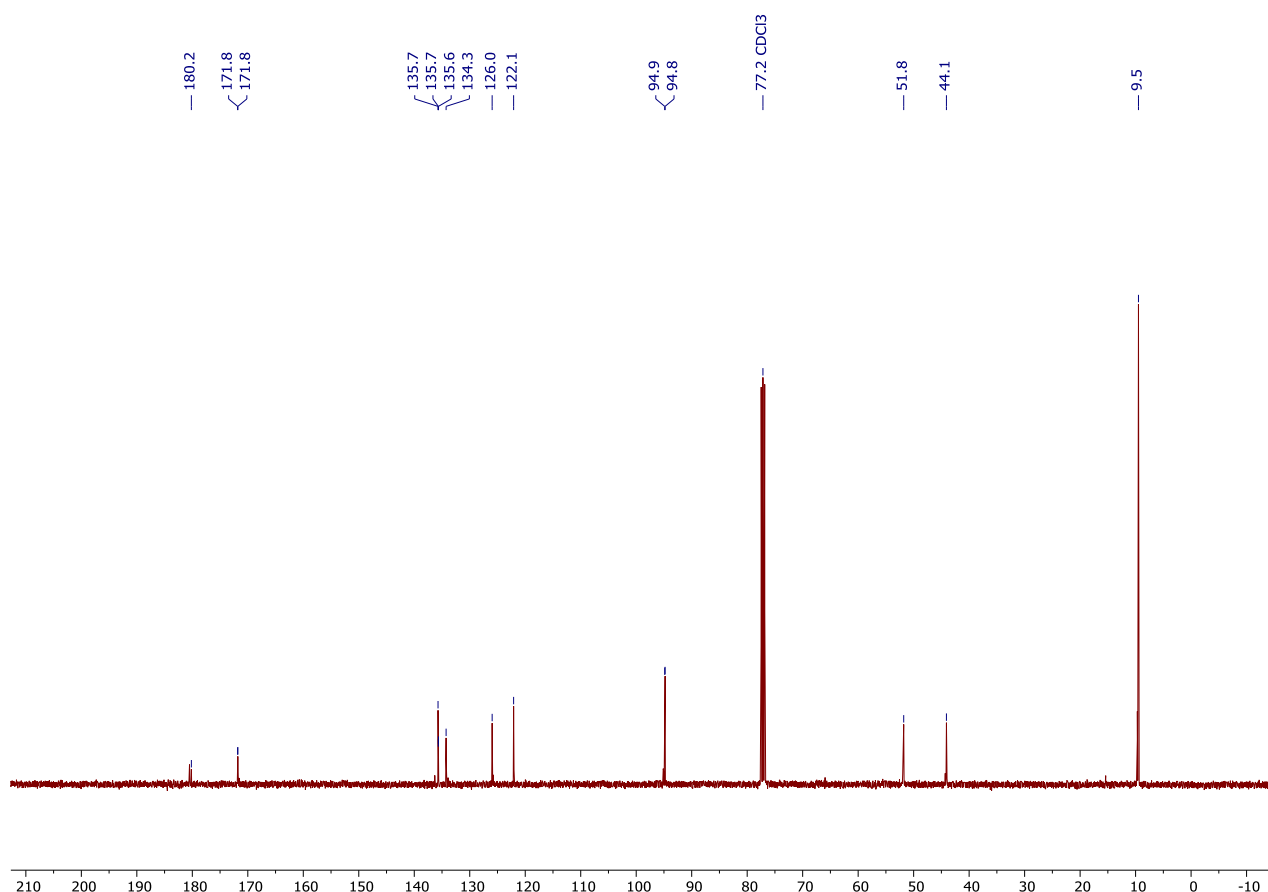

## 2.4 Preparation of Imidazoisquinolines 4a–q

### **General procedure A (GP1): Preparation of imidazoisquinoline 4a–q**

A solution of the corresponding imidazoline **2** (0.2 mmol, 1 equiv) and corresponding diazo compound **3** (0.24 mmol, 1.2 equiv) with [RhCp\*Cl<sub>2</sub>]<sub>2</sub> (2.5 mol %, 0.005 mmol, 1.5 mg) and AgNTf<sub>2</sub> (10 mol %, 0.02 mmol, 7.8 mg) in TFE (2 mL) was placed in sealed vial (10 mL) equipped with a stirring bar. The reaction was stirred at 80 °C for 12 h. The solvent was evaporated under reduced pressure and the residue was purified by column chromatography (absorption at  $\lambda = 254$  nm).

*10-Chloro-6,6-dimethyl-2,5,6,7-tetrahydroimidazo[1,2-f]phenanthridin-8(3H)-one (4a)*. Obtained according to GP1 from diazo compound **3a** (40 mg, 0.24 mmol, 1.2 equiv) and imidazoline **2a** (36

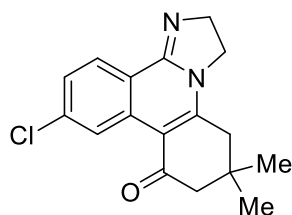

mg, 0.2 mmol, 1 equiv). Column chromatography was carried out on silica gel, eluent: DCM (with 1% Et<sub>3</sub>N)/methanol, from 0 to 5% of methanol.

Yield: 53 mg (88%). Pale orange solid; mp 203.8–204.5 °C. <sup>1</sup>H NMR (400 MHz, CDCl<sub>3</sub>)  $\delta$  9.30 – 9.24 (m, 1H), 8.02 – 7.96 (m, 1H), 7.28 – 7.22 (m, 1H), 4.17 – 3.98 (m, 4H), 2.53 (s, 2H), 2.38 (s, 2H), 1.12 (s, 6H). <sup>13</sup>C NMR (101 MHz, CDCl<sub>3</sub>)  $\delta$  194.5, 155.1, 153.2, 138.8, 134.8, 127.2, 127.0, 126.0, 119.3, 106.5, 53.1, 52.2, 48.0, 42.3, 31.8, 28.5. HRMS (ESI)  $m/z$ : [M+H]<sup>+</sup> Calc. for C<sub>17</sub>H<sub>18</sub>ClN<sub>2</sub>O 301.1102; Found 301.1105.

*10-Methoxy-6,6-dimethyl-2,5,6,7-tetrahydroimidazo[1,2-f]phenanthridin-8(3H)-one* (**4b**).

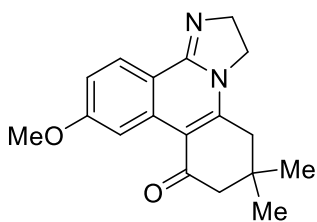

Obtained according to GP1 from diazo compound **3a** (40 mg, 0.24 mmol, 1.2 equiv) and imidazoline **2e** (35 mg, 0.2 mmol, 1 equiv). Column chromatography was carried out on silica gel, eluent: DCM (with 1% Et<sub>3</sub>N)/methanol, from 0 to 7% of methanol. Yield: 27 mg (46 %). Yellow solid; mp 235.2–235.7 °C. <sup>1</sup>H NMR (400 MHz, CDCl<sub>3</sub>) δ 8.89 – 8.84 (m, 1H), 8.08 – 8.01 (m, 1H), 6.95 – 6.88 (m, 1H), 4.16 – 3.99 (m, 4H), 3.90 (s, 3H), 2.53 (s, 2H), 2.41 (s, 2H), 1.13 (s, 6H). <sup>13</sup>C NMR (101 MHz, CDCl<sub>3</sub>) δ 195.0, 163.0, 155.4, 152.5, 135.4, 127.4, 115.8, 113.6, 108.1, 107.4, 55.4, 52.3, 52.0, 47.9, 42.1, 31.7, 28.3. HRMS (ESI) *m/z*: [M+H]<sup>+</sup> Calc. for C<sub>18</sub>H<sub>21</sub>N<sub>2</sub>O<sub>2</sub> 297.1598; Found 297.1602.

*10-Ethyl-6,6-dimethyl-2,5,6,7-tetrahydroimidazo[1,2-f]phenanthridin-8(3H)-one* (**4c**). Obtained

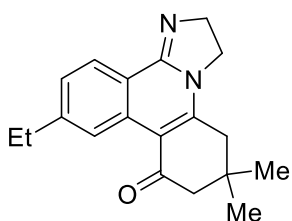

according to GP1 from diazo compound **3a** (40 mg, 0.24 mmol, 1.2 equiv) and imidazoline **2d** (35 mg, 0.2 mmol, 1 equiv). Column chromatography was carried out on silica gel, eluent: DCM (with 1% Et<sub>3</sub>N)/methanol, from 0 to 5% of methanol. Yield: 42 mg (71%). Beige solid; mp 215.3–215.9 °C. <sup>1</sup>H NMR (400 MHz, CDCl<sub>3</sub>) δ 9.10 – 9.05 (m, 1H), 8.04 – 7.98 (m, 1H), 7.20 – 7.13 (m, 1H), 4.12 – 3.90 (m, 4H), 2.71 (q, *J* = 7.6 Hz, 2H), 2.42 (s, 2H), 2.36 (s, 2H), 1.26 (t, *J* = 7.6 Hz, 3H), 1.08 (s, 6H). <sup>13</sup>C NMR (101 MHz, CDCl<sub>3</sub>) δ 194.9, 155.6, 152.2, 149.0, 133.5, 126.7, 125.8, 125.2, 118.5, 107.2, 52.8, 52.3, 47.8, 42.1, 31.7, 29.5, 28.3, 15.4. HRMS (ESI) *m/z*: [M+H]<sup>+</sup> Calc. for C<sub>19</sub>H<sub>23</sub>N<sub>2</sub>O 295.1805; Found 295.1811.

*6,6-Dimethyl-10-nitro-2,5,6,7-tetrahydroimidazo[1,2-f]phenanthridin-8(3H)-one* (**4d**). Obtained

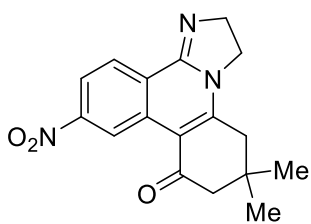

according to GP1 from diazo compound **3a** (40 mg, 0.25 mmol, 1 equiv) and imidazoline **2c** (38 mg, 0.2 mmol, 1 equiv). Column chromatography was carried out on silica gel, eluent: DCM (with 1% Et<sub>3</sub>N)/methanol, from 0 to 7% of methanol. Yield: 53 mg (86%). Orange solid; 216.4–216.8 °C. <sup>1</sup>H NMR (400 MHz, CDCl<sub>3</sub>) δ 9.33 – 9.28 (m, 1H), 8.25 – 8.19 (m, 1H), 7.71 – 7.64 (m, 1H), 4.50 (t, *J* = 9.8 Hz, 2H), 4.12 (t, *J* = 9.8 Hz, 2H), 2.90 (s, 2H), 2.46 (s, 2H), 1.10 (s, 3H). <sup>13</sup>C NMR (101 MHz, CDCl<sub>3</sub>) δ 195.3, 155.2, 153.5, 139.7, 135.1, 127.9, 127.7, 124.9, 115.2, 108.3, 51.7, 48.3, 47.1, 40.1, 31.6, 27.6. HRMS (ESI) *m/z*: [M+H]<sup>+</sup> Calc. for C<sub>17</sub>H<sub>18</sub>N<sub>3</sub>O<sub>3</sub> 312.1343; Found 312.1348.

*6,6-Dimethyl-10-(trifluoromethyl)-2,5,6,7-tetrahydroimidazo[1,2-f]phenanthridin-8(3H)-one (4e).*

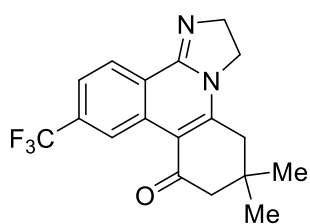

Obtained according to GP1 from diazo compound **3a** (40 mg, 0.24 mmol, 1.2 equiv) and imidazoline **2b** (43 mg, 0.2 mmol, 1 equiv). Column chromatography was carried out on silica gel, eluent: DCM (with 1% Et<sub>3</sub>N)/methanol, from 0 to 5% of methanol. Yield: 53 mg (80%). White solid; mp 245.8–246.4 °C. <sup>1</sup>H NMR (400 MHz, CDCl<sub>3</sub>) δ 9.63 – 9.59 (m, 1H), 8.26 – 8.19 (m, 1H), 7.58 – 7.51 (m, 1H), 4.26 – 4.09 (m, 4H), 2.64 (s, 2H), 2.46 (s, 2H), 1.17 (s, 6H). <sup>13</sup>C NMR (101 MHz, CDCl<sub>3</sub>) δ 194.7, 155.1, 153.2, 133.9 (q, *J* = 32.1 Hz), 133.9, 126.5, 124.1 (q, *J* = 273.0 Hz), 123.8 (q, *J* = 4.2 Hz), 123.3 – 123.3 (m), 122.9 (q, *J* = 3.5 Hz), 106.9, 53.1, 52.3, 48.1, 42.4, 31.9, 28.5. <sup>19</sup>F NMR (376 MHz, CDCl<sub>3</sub>) δ -63.02. HRMS (ESI) *m/z*: [M+H]<sup>+</sup> Calc. for C<sub>17</sub>H<sub>18</sub>ClN<sub>2</sub>O 301.1102; Found 301.1107.

*12-Fluoro-6,6-dimethyl-2,5,6,7-tetrahydroimidazo[1,2-f]phenanthridin-8(3H)-one (4f).* Obtained

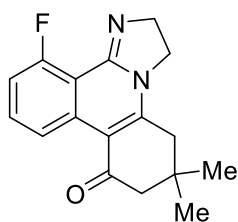

according to GP1 from diazo compound **3a** (40 mg, 0.24 mmol, 1.2 equiv) and imidazoline **2f** (33 mg, 0.2 mmol, 1 equiv). Column chromatography was carried out on silica gel, eluent: DCM (with 1% Et<sub>3</sub>N)/methanol, from 0 to 5% of methanol. Yield: 57 mg (99%). White solid; 215.3–217.3 °C. <sup>1</sup>H NMR (400 MHz, CDCl<sub>3</sub>) δ 9.07 – 9.01 (m, 1H), 7.51 – 7.41 (m, 1H), 7.07 – 6.97 (m, 1H), 4.26 – 4.15 (m, 2H), 4.01 – 3.92 (m, 2H), 2.55 (s, 2H), 2.40 (s, 2H), 1.12 (s, 3H). <sup>13</sup>C NMR (101 MHz, CDCl<sub>3</sub>) δ 194.4, 160.9 (d, *J* = 259.4 Hz), 153.1, 152.2 (d, *J* = 8.4 Hz), 135.9 (d, *J* = 1.0 Hz), 133.0 (d, *J* = 9.6 Hz), 121.8 (d, *J* = 4.3 Hz), 113.6 (d, *J* = 21.0 Hz), 110.3 (d, *J* = 9.0 Hz), 106.8 (d, *J* = 1.8 Hz), 53.8, 52.3, 46.7, 42.5, 31.6, 28.4. <sup>19</sup>F NMR (376 MHz, CDCl<sub>3</sub>) δ -108.38. HRMS (ESI) *m/z*: [M+H]<sup>+</sup> Calc. for C<sub>17</sub>H<sub>18</sub>FN<sub>2</sub>O 285.1398; Found 285.1403.

*2,6,6-Trimethyl-2,5,6,7-tetrahydroimidazo[1,2-f]phenanthridin-8(3H)-one (4g).* Obtained

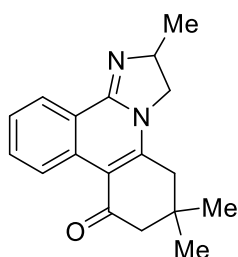

according to GP1 from diazo compound **3a** (40 mg, 0.24 mmol, 1.2 equiv) and imidazoline **2g** (32 mg, 0.2 mmol, 1 equiv). Column chromatography was carried out on silica gel, eluent: DCM (with 1% Et<sub>3</sub>N)/methanol, from 0 to 10% of methanol. Yield: 43 mg (77%). Beige solid. Mixture of regioisomers in ratio 87:13. *Major regioisomer*: <sup>1</sup>H NMR (400 MHz, CDCl<sub>3</sub>) δ 9.23 – 9.16 (m, 1H), 8.15 – 8.08 (m, 1H), 7.58 – 7.49 (m, 1H), 7.36 – 7.24 (m, 1H), 4.52 – 4.35 (m, 1H), 4.15 (t, *J* = 10.3 Hz, 1H), 3.58 (dd, *J* = 10.5, 7.5 Hz, 1H), 2.52 (s, 2H), 2.39 (s, 2H), 1.40 (d, *J* = 6.6 Hz, 3H), 1.11 (s, 6H). <sup>13</sup>C NMR (101 MHz, CDCl<sub>3</sub>) δ 194.9, 154.5, 152.1, 133.5, 132.3, 126.6, 126.3, 125.9, 120.7, 107.5, 59.9, 54.8, 52.4, 42.2, 31.8, 28.5, 22.9. *Minor regioisomer*: <sup>1</sup>H NMR (400 MHz, CDCl<sub>3</sub>) δ 9.23 – 9.16 (m, 1H), 8.15 – 8.08 (m, 1H), 7.58 – 7.49 (m, 1H), 7.36 – 7.24 (m, 1H), 4.52 – 4.35 (m, 1H), 4.23 – 4.18 (m, 1H), 3.72 (dd, *J* = 14.8, 2.8 Hz, 1H), 2.43 (s, 2H), 2.41 (s, 2H), 1.36 (d, *J* = 6.3

Hz, 3H), 1.14 (s, 6H).  $^{13}\text{C}$  NMR (101 MHz,  $\text{CDCl}_3$ )  $\delta$  194.9, 154.8, 151.9, 133.3, 132.3, 126.7, 126.4, 125.7, 121.4, 108.0, 60.9, 55.7, 52.7, 41.3, 32.2, 28.1, 21.8. HRMS (ESI)  $m/z$ :  $[\text{M}+\text{H}]^+$  Calc. for  $\text{C}_{18}\text{H}_{21}\text{N}_2\text{O}$  281.1648; Found 281.1651.

*10-Chloro-2,5,6,7-tetrahydroimidazo[1,2-f]phenanthridin-8(3H)-one (4h)*. Obtained according to

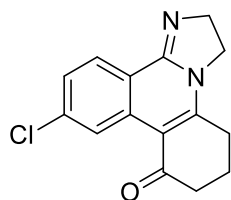

GP1 from diazo compound **3b** (33 mg, 0.24 mmol, 1.2 equiv) and imidazoline **2a** (36 mg, 0.2 mmol, 1 equiv). Column chromatography was carried out on silica gel, eluent: DCM (with 1%  $\text{Et}_3\text{N}$ )/methanol, from 0 to 5% of methanol. Yield: 48 mg (89%). Pale orange solid; mp 176.0–176.2 °C.  $^1\text{H}$  NMR (400 MHz,  $\text{CDCl}_3$ )  $\delta$  9.23 – 9.18 (m, 1H), 7.96 – 7.90 (m, 2H), 7.30 – 7.19 (m, 2H), 4.13 – 3.94 (m, 6H), 2.65 (t,  $J$  = 6.3 Hz, 4H), 2.49 (t,  $J$  = 6.6 Hz, 3H), 2.05 (p,  $J$  = 6.4 Hz, 3H).  $^{13}\text{C}$  NMR (101 MHz,  $\text{CDCl}_3$ )  $\delta$  194.6, 154.7, 154.7, 138.5, 134.9, 127.2, 126.8, 126.1, 119.3, 107.4, 53.0, 47.8, 38.5, 28.6, 20.5. HRMS (ESI)  $m/z$ :  $[\text{M}+\text{H}]^+$  Calc. for  $\text{C}_{15}\text{H}_{14}\text{ClN}_2\text{O}$  273.0789; Found 273.0793.

*10-(Trifluoromethyl)-2,5,6,7-tetrahydroimidazo[1,2-f]phenanthridin-8(3H)-one (4i)*. Obtained according to GP1 from diazo compound **3b** (33 mg, 0.24 mmol, 1.2 equiv) and imidazoline **2b** (43 mg, 0.2 mmol, 1 equiv). Column chromatography was carried out on silica gel, eluent: DCM (with 1%  $\text{Et}_3\text{N}$ )/methanol, from 0 to 10% of methanol. Yield: 45 mg (74%). White solid; mp 232.4–233.0 °C.  $^1\text{H}$  NMR (400 MHz,  $\text{CDCl}_3$ )  $\delta$  9.61 – 9.56 (m, 1H), 8.24 – 8.18 (m, 1H), 7.59 – 7.52 (m, 1H), 4.25 – 4.07 (m, 4H), 2.78 (t,  $J$  = 6.3 Hz, 2H), 2.58 (t,  $J$  = 6.4 Hz, 2H), 2.13 (p,  $J$  = 6.4 Hz, 2H).  $^{13}\text{C}$  NMR (101 MHz,  $\text{CDCl}_3$ )  $\delta$  194.7, 154.9, 154.7, 134.0, 133.8 (q,  $J$  = 32.1 Hz), 126.5, 124.1 (q,  $J$  = 273.1 Hz), 124.1 (q,  $J$  = 4.1 Hz), 123.6 – 123.5 (m), 122.9 (q,  $J$  = 3.6 Hz), 107.9, 53.2, 48.0, 38.6, 28.7, 20.6.  $^{19}\text{F}$  NMR (376 MHz,  $\text{CDCl}_3$ )  $\delta$  -63.00. HRMS (ESI)  $m/z$ :  $[\text{M}+\text{H}]^+$  Calc. for  $\text{C}_{16}\text{H}_{14}\text{F}_3\text{N}_2\text{O}$  307.1053; Found 307.1058.

*10-(Trifluoromethyl)-2,5,6,7-tetrahydroimidazo[1,2-f]phenanthridin-8(3H)-one (4i)*. Obtained

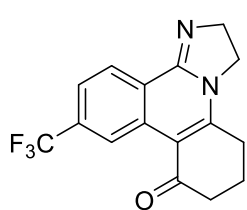

according to GP1 from diazo compound **3b** (33 mg, 0.24 mmol, 1.2 equiv) and imidazoline **2b** (43 mg, 0.2 mmol, 1 equiv). Column chromatography was carried out on silica gel, eluent: DCM (with 1%  $\text{Et}_3\text{N}$ )/methanol, from 0 to 10% of methanol. Yield: 45 mg (74%). White solid; mp 232.4–233.0 °C.  $^1\text{H}$  NMR (400 MHz,  $\text{CDCl}_3$ )  $\delta$  9.61 – 9.56 (m, 1H), 8.24 – 8.18 (m, 1H), 7.59 – 7.52 (m, 1H), 4.25 – 4.07 (m, 4H), 2.78 (t,  $J$  = 6.3 Hz, 2H), 2.58 (t,  $J$  = 6.4 Hz, 2H), 2.13 (p,  $J$  = 6.4 Hz, 2H).  $^{13}\text{C}$  NMR (101 MHz,  $\text{CDCl}_3$ )  $\delta$  194.7, 154.9, 154.7, 134.0, 133.8 (q,  $J$  = 32.1 Hz), 126.5, 124.1 (q,  $J$  = 273.1 Hz), 124.1 (q,  $J$  = 4.1 Hz), 123.6 – 123.5 (m), 122.9 (q,  $J$  = 3.6 Hz), 107.9, 53.2, 48.0, 38.6, 28.7, 20.6.  $^{19}\text{F}$  NMR (376 MHz,  $\text{CDCl}_3$ )  $\delta$  -63.00. HRMS (ESI)  $m/z$ :  $[\text{M}+\text{H}]^+$  Calc. for  $\text{C}_{16}\text{H}_{14}\text{F}_3\text{N}_2\text{O}$  307.1053; Found 307.1058.

*10-Nitro-2,5,6,7-tetrahydroimidazo[1,2-f]phenanthridin-8(3H)-one (4j)*. Obtained according to GP1 from diazo compound **3b** (33 mg, 0.24 mmol, 1.2 equiv) and imidazoline **2c** (38 mg, 0.2 mmol, 1 equiv). Column chromatography was carried out on silica gel, eluent: DCM (with 1%  $\text{Et}_3\text{N}$ )/methanol, from 0 to 7% of methanol. Yield: 43 mg (77%). Orange solid.  $^1\text{H}$  NMR (400 MHz,  $\text{CDCl}_3$ )  $\delta$  10.09 – 10.04 (m, 1H), 8.21 – 8.14 (m, 1H), 8.09 – 8.02 (m, 1H), 4.25 – 4.08 (m, 4H), 2.80 (t,  $J$  = 6.1 Hz, 2H), 2.59 (t,  $J$  = 6.5 Hz, 2H), 2.15 (p,  $J$  = 6.8 Hz, 2H).  $^{13}\text{C}$  NMR (101 MHz,  $\text{CDCl}_3$ )  $\delta$  194.4, 155.4, 154.3, 150.2, 134.6, 127.0, 125.4, 123.8, 122.1, 120.6, 107.5, 53.5, 48.0, 38.5, 28.7, 20.5. HRMS (ESI)  $m/z$ :  $[\text{M}+\text{H}]^+$  Calc. for  $\text{C}_{15}\text{H}_{14}\text{N}_3\text{O}_3$  284.1030; Found 284.1034.

*10-Nitro-2,5,6,7-tetrahydroimidazo[1,2-f]phenanthridin-8(3H)-one (4j)*. Obtained according to

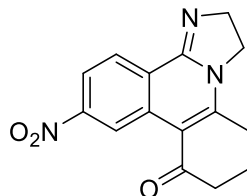

GP1 from diazo compound **3b** (33 mg, 0.24 mmol, 1.2 equiv) and imidazoline **2c** (38 mg, 0.2 mmol, 1 equiv). Column chromatography was carried out on silica gel, eluent: DCM (with 1%  $\text{Et}_3\text{N}$ )/methanol, from 0 to 7% of methanol. Yield: 43 mg (77%). Orange solid.  $^1\text{H}$  NMR (400 MHz,  $\text{CDCl}_3$ )  $\delta$  10.09 – 10.04 (m, 1H), 8.21 – 8.14 (m, 1H), 8.09 – 8.02 (m, 1H), 4.25 – 4.08 (m, 4H), 2.80 (t,  $J$  = 6.1 Hz, 2H), 2.59 (t,  $J$  = 6.5 Hz, 2H), 2.15 (p,  $J$  = 6.8 Hz, 2H).  $^{13}\text{C}$  NMR (101 MHz,  $\text{CDCl}_3$ )  $\delta$  194.4, 155.4, 154.3, 150.2, 134.6, 127.0, 125.4, 123.8, 122.1, 120.6, 107.5, 53.5, 48.0, 38.5, 28.7, 20.5. HRMS (ESI)  $m/z$ :  $[\text{M}+\text{H}]^+$  Calc. for  $\text{C}_{15}\text{H}_{14}\text{N}_3\text{O}_3$  284.1030; Found 284.1034.

$^1\text{H}$  NMR (400 MHz,  $\text{CDCl}_3$ )  $\delta$  10.09 – 10.04 (m, 1H), 8.21 – 8.14 (m, 1H), 8.09 – 8.02 (m, 1H), 4.25 – 4.08 (m, 4H), 2.80 (t,  $J$  = 6.1 Hz, 2H), 2.59 (t,  $J$  = 6.5 Hz, 2H), 2.15 (p,  $J$  = 6.8 Hz, 2H).  $^{13}\text{C}$  NMR (101 MHz,  $\text{CDCl}_3$ )  $\delta$  194.4, 155.4, 154.3, 150.2, 134.6, 127.0, 125.4, 123.8, 122.1, 120.6, 107.5, 53.5, 48.0, 38.5, 28.7, 20.5. HRMS (ESI)  $m/z$ :  $[\text{M}+\text{H}]^+$  Calc. for  $\text{C}_{15}\text{H}_{14}\text{N}_3\text{O}_3$  284.1030; Found 284.1034.

*10-Methoxy-6-phenyl-2,5,6,7-tetrahydroimidazo[1,2-f]phenanthridin-8(3H)-one* (**4k**). Obtained

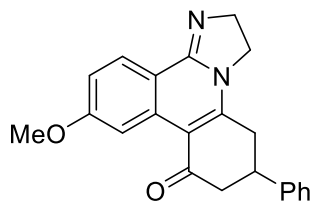

according to GP1 from diazo compound **3c** (52 mg, 0.24 mmol, 1.2 equiv) and imidazoline **2e** (38 mg, 0.2 mmol, 1 equiv). Column chromatography was carried out on silica gel, eluent: DCM (with 1% Et<sub>3</sub>N)/methanol, from 0 to 3% of methanol. Yield: 64 mg (93%). Beige solid. <sup>1</sup>H NMR (400 MHz, CDCl<sub>3</sub>) δ 8.91 – 8.85 (m, 1H), 8.09 – 8.03 (m, 1H), 7.44 – 7.36 (m, 2H), 7.34 – 7.28 (m, 3H), 6.98 – 6.91 (m, 1H), 4.18 – 4.06 (m, 3H), 4.04 – 3.98 (m, 1H), 3.92 (s, 3H), 3.54 – 3.41 (m, 1H), 3.01 – 2.91 (m, 2H), 2.86 – 2.79 (m, 2H). <sup>13</sup>C NMR (101 MHz, CDCl<sub>3</sub>) δ 194.2, 162.8, 154.9, 153.8, 142.4, 135.4, 129.0, 127.5, 127.4, 115.5, 114.1, 108.5, 107.5, 55.4, 52.7, 47.8, 45.4, 38.5, 36.1. HRMS (ESI) *m/z*: [M+H]<sup>+</sup> Calc. for C<sub>22</sub>H<sub>21</sub>N<sub>2</sub>O<sub>2</sub> 345.1598; Found 345.1602.

*10-Chloro-6-phenyl-2,5,6,7-tetrahydroimidazo[1,2-f]phenanthridin-8(3H)-one* (**4l**). Obtained

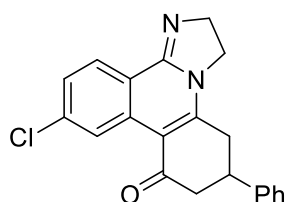

according to GP1 from diazo compound **3c** (52 mg, 0.24 mmol, 1.2 equiv) and imidazoline **2a** (36 mg, 0.2 mmol, 1 equiv). Column chromatography was carried out on silica gel, eluent: DCM (with 1% Et<sub>3</sub>N)/methanol, from 0 to 3% of methanol. Yield: 63 mg (91%). White solid; mp 234.4–234.7 °C. <sup>1</sup>H NMR (400 MHz, CDCl<sub>3</sub>) δ 9.33 – 9.28 (m, 1H), 8.07 – 8.00 (m, 1H), 7.44 – 7.36 (m, 1H), 7.31 – 7.24 (m, 1H), 4.30 – 3.93 (m, 2H), 3.52 – 3.39 (m, 1H), 3.01 – 2.84 (m, 1H), 2.83 – 2.73 (m, 2H). <sup>13</sup>C NMR (101 MHz, CDCl<sub>3</sub>) δ 193.8, 154.8, 153.9, 142.2, 138.9, 134.8, 129.2, 127.6, 127.3, 127.2, 126.2, 119.4, 107.2, 53.1, 48.0, 45.4, 38.6, 36.4. HRMS (ESI) *m/z*: [M+H]<sup>+</sup> Calc. for C<sub>21</sub>H<sub>18</sub>ClN<sub>2</sub>O 349.1102; Found 349.1107.

*10-Chloro-2,5-dihydro-3H-imidazo[2,1-a]pyrano[3,4-c]isoquinolin-8(7H)-one* (**4m**). Obtained

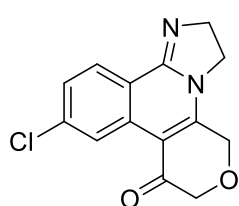

according to GP1 from diazo compound **3h** (34 mg, 0.24 mmol, 1.2 equiv) and imidazoline **2a** (36 mg, 0.2 mmol, 1 equiv). Column chromatography was carried out on silica gel, eluent: DCM (with 1% Et<sub>3</sub>N)/methanol, from 0 to 13% of methanol. Yield: 32 mg (64%). Yellow solid; mp 180.4–181.7 °C. <sup>1</sup>H NMR (400 MHz, CDCl<sub>3</sub>) δ 9.05 – 9.00 (m, 1H), 7.98 – 7.92 (m, 1H), 7.32 – 7.25 (m, 1H), 4.58 (s, 1H), 4.21 – 4.12 (m, 2H), 3.93 (t, *J* = 9.6 Hz, 1H). <sup>13</sup>C NMR (101 MHz, CDCl<sub>3</sub>) δ 189.3, 154.1, 151.8, 138.9, 133.3, 127.5, 127.3, 125.8, 119.3, 72.2, 64.4, 53.7, 46.4. HRMS (ESI) *m/z*: [M+H]<sup>+</sup> Calc. for C<sub>14</sub>H<sub>12</sub>ClN<sub>2</sub>O<sub>2</sub> 275.0582; Found 275.0585.

*11-Chloro-2,3,5,6,7,8-hexahydro-9H-cyclohepta[c]imidazo[2,1-a]isoquinolin-9-one* (**4n**).

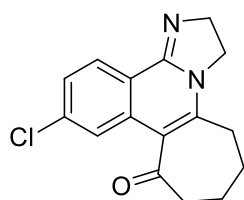

Obtained according to GP1 from diazo compound **3f** (37 mg, 0.24 mmol, 1.2 equiv) and imidazoline **2a** (36 mg, 0.2 mmol, 1 equiv). Column chromatography was carried out on silica gel, eluent: DCM (with 1% Et<sub>3</sub>N)/methanol, from 0 to 10% of methanol. Yield: 34 mg (60%). Pale yellow

solid; mp 168.3–168.8 °C. <sup>1</sup>H NMR (400 MHz, CDCl<sub>3</sub>) δ 8.20 – 8.15 (m, 1H), 7.99 – 7.92 (m, 1H), 7.25 – 7.16 (m, 1H), 4.14 – 3.99 (m, 3H), 2.73 (t, *J* = 6.5 Hz, 1H), 2.59 (t, *J* = 6.1 Hz, 1H), 1.88 – 1.76 (m, 3H). <sup>13</sup>C NMR (101 MHz, CDCl<sub>3</sub>) δ 203.4, 155.6, 148.2, 138.9, 135.1, 127.6, 126.9, 124.2, 118.5, 112.6, 51.4, 48.3, 42.0, 29.2, 22.2, 20.6. HRMS (ESI) *m/z*: [M+H]<sup>+</sup> Calc. for C<sub>16</sub>H<sub>16</sub>ClN<sub>2</sub>O 273.0789; Found 273.0792.

*9-Chloro-2,3,5,6-tetrahydro-7H-cyclopenta[c]imidazo[2,1-a]isoquinolin-7-one (4o)*. Obtained

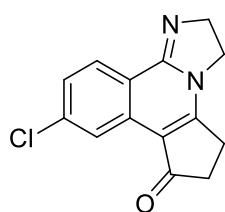

according to GP1 from diazo compound **3e** (30 mg, 0.24 mmol, 1.2 equiv) and imidazoline **2a** (36 mg, 0.2 mmol, 1 equiv). Column chromatography was carried out on silica gel, eluent: DCM (with 1% Et<sub>3</sub>N)/methanol, from 0 to 15% of methanol. Yield: 45 mg (87%). White solid; mp 243.9–244.6 °C. <sup>1</sup>H NMR (400 MHz, DMSO-*d*<sub>6</sub>+CDCl<sub>3</sub> in ratio 1:6) δ 8.46 – 8.41 (m, 1H), 7.51 – 7.47 (m, 1H), 7.24 – 7.17 (m, 1H), 4.19 – 4.09 (m, 2H), 4.06 – 3.96 (m, 2H), 2.81 – 2.74 (m, 2H), 2.58 – 2.51 (m, 2H). <sup>13</sup>C NMR (101 MHz, DMSO-*d*<sub>6</sub>+CDCl<sub>3</sub> in ratio 1:6) δ 197.8, 165.5, 154.8, 137.8, 132.1, 127.1, 126.5, 122.0, 118.5, 109.8, 53.6, 45.1, 34.1, 23.7. HRMS (ESI) *m/z*: [M+H]<sup>+</sup> Calc. for C<sub>14</sub>H<sub>12</sub>ClN<sub>2</sub>O 259.0633; Found 259.0638.

*tert-Butyl 10-chloro-8-oxo-2,3,5,8-tetrahydrobenzo[c]imidazo[1,2-a][1,6]naphthyridine-7(6H)-*

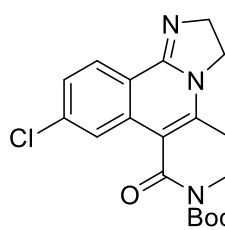

*carboxylate (4p)*. Obtained according to GP1 from diazo compound **3g** (57 mg, 0.24 mmol, 1.2 equiv) and imidazoline **2a** (36 mg, 0.2 mmol, 1 equiv). Column chromatography was carried out on silica gel, eluent: DCM (with 1% Et<sub>3</sub>N)/methanol, from 0 to 15% of methanol. Yield: 54 mg (72%). Beige solid; mp 137.6–138.9 °C. <sup>1</sup>H NMR (400 MHz, CDCl<sub>3</sub>) δ 8.96 – 8.91 (m, 1H), 7.94 – 7.88 (m, 1H), 7.28 – 7.20 (m, 1H), 4.14 – 3.97 (m, 4H), 3.91 (t, *J* = 6.3 Hz, 2H), 2.77 (t, *J* = 6.3 Hz, 2H), 1.56 (s, 9H). <sup>13</sup>C NMR (101 MHz, CDCl<sub>3</sub>) δ 162.94, 154.7, 152.7, 149.6, 138.7, 134.9, 127.3, 127.0, 126.2, 119.7, 101.6, 83.1, 53.1, 47.5, 41.2, 28.3, 27.4. HRMS (ESI) *m/z*: [M+H]<sup>+</sup> Calc. for C<sub>14</sub>H<sub>13</sub>ClN<sub>3</sub>O 374.1266; Found 374.1271.

*10-Chloro-6-methyl-2,5,6,7-tetrahydroimidazo[1,2-f]phenanthridin-8(3H)-one (4q)*. Obtained

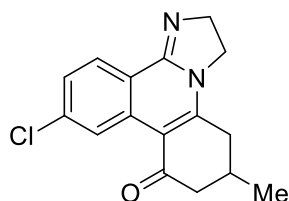

according to GP1 from diazo compound **3d** (37 mg, 0.24 mmol, 1.2 equiv) and imidazoline **2a** (36 mg, 0.2 mmol, 1 equiv). Column chromatography was carried out on silica gel, eluent: DCM (with 1% Et<sub>3</sub>N)/methanol, from 0 to 7% of methanol. Yield: 35 mg (61%). White solid; mp 168.0–168.4 °C. <sup>1</sup>H NMR (400 MHz, CDCl<sub>3</sub>) δ 9.26 – 9.21 (m, 1H), 8.02 – 7.92 (m, 1H), 7.28 – 7.20 (m, 1H),

4.16 – 3.91 (m, 3H), 2.73 – 2.60 (m, 1H), 2.59 – 2.51 (m, 1H), 2.38 – 2.14 (m, 1H), 1.12 (d,  $J = 6.1$  Hz, 2H).  $^{13}\text{C}$  NMR (101 MHz,  $\text{CDCl}_3$ )  $\delta$  194.6, 154.9, 154.2, 138.75, 134.9, 127.2, 126.9, 126.1, 119.3, 107.1, 53.0, 47.9, 46.75, 36.6, 27.9, 21.1. HRMS (ESI)  $m/z$ :  $[\text{M}+\text{H}]^+$  Calc. for  $\text{C}_{16}\text{H}_{16}\text{ClN}_2\text{O}$  273.0789; Found 273.0793.

## 2. Copies of NMR spectra

Copy of  $^1\text{H}$  (400.13 MHz,  $\text{CDCl}_3$ ) NMR spectrum of **4a**

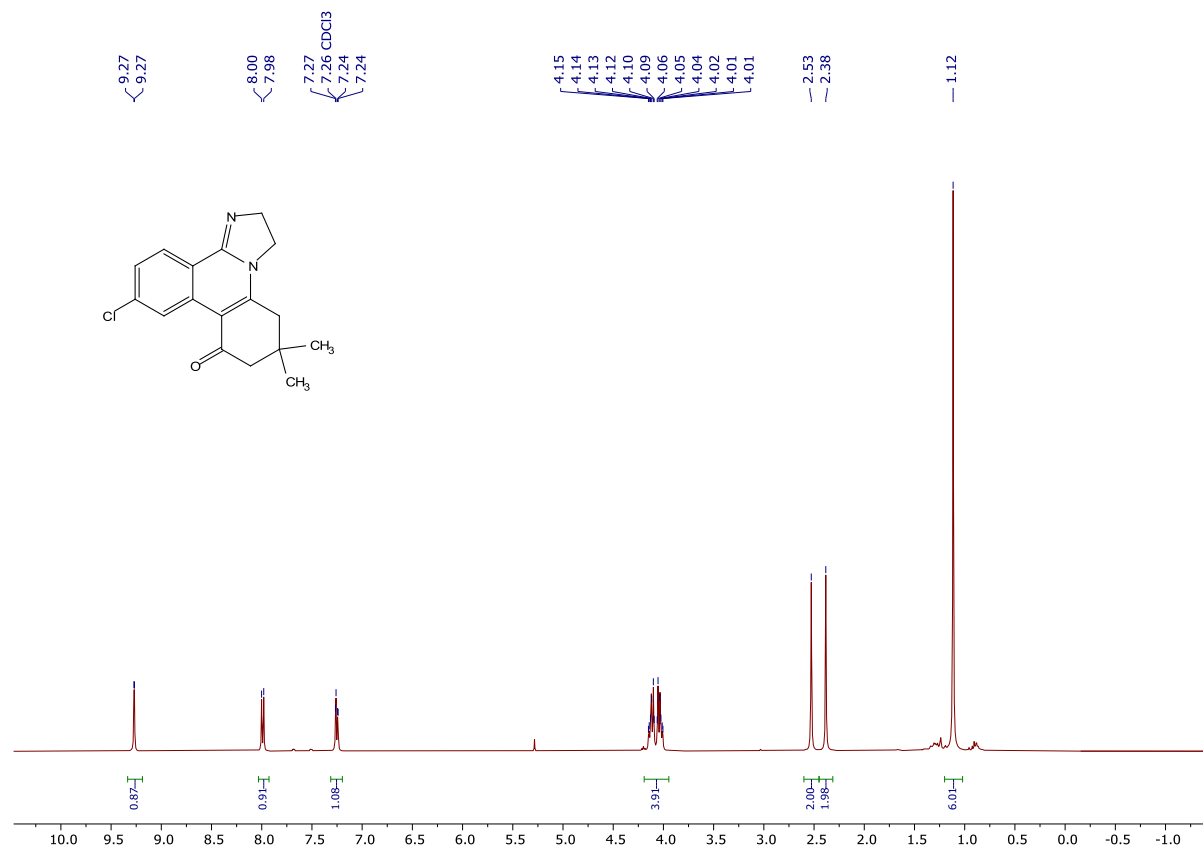

Copy of  $^{13}\text{C}\{^1\text{H}\}$  (100.61 MHz,  $\text{CDCl}_3$ ) NMR spectrum of **4a**

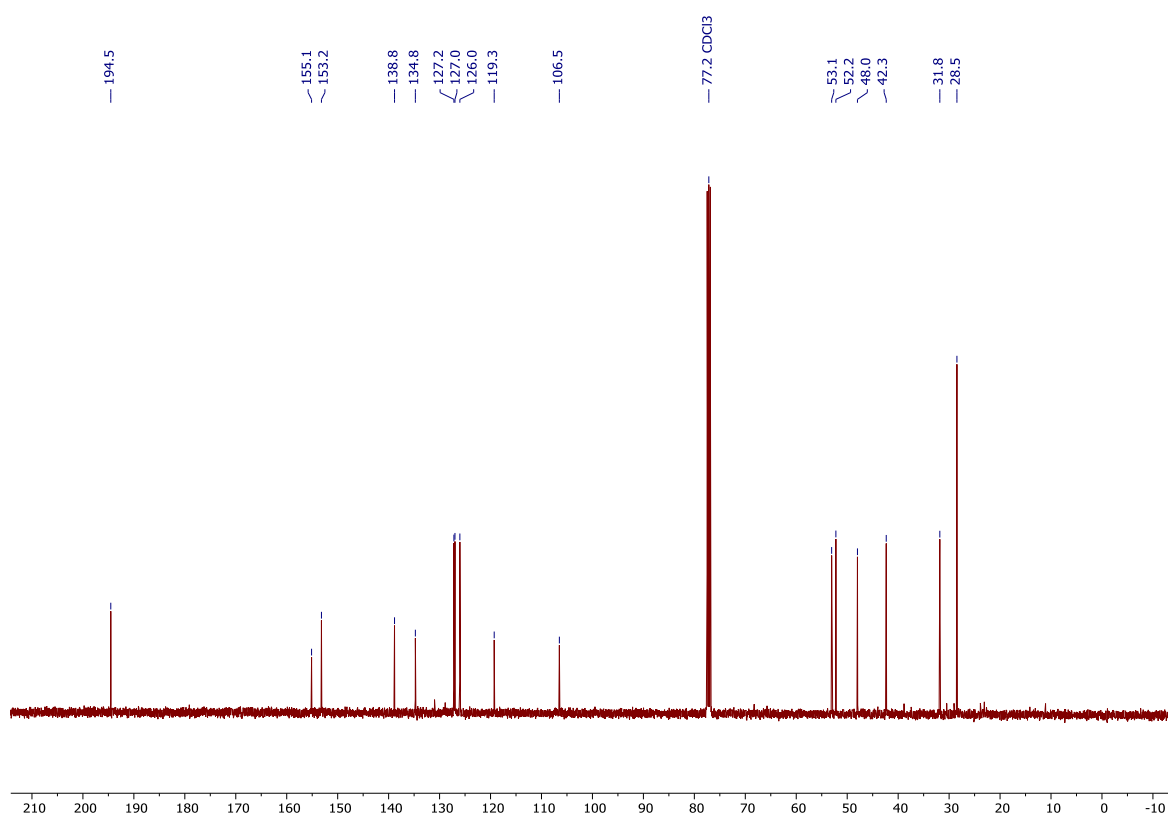

Copy of  $^1\text{H}$  (400.13 MHz,  $\text{CDCl}_3$ ) NMR spectrum of **4b**

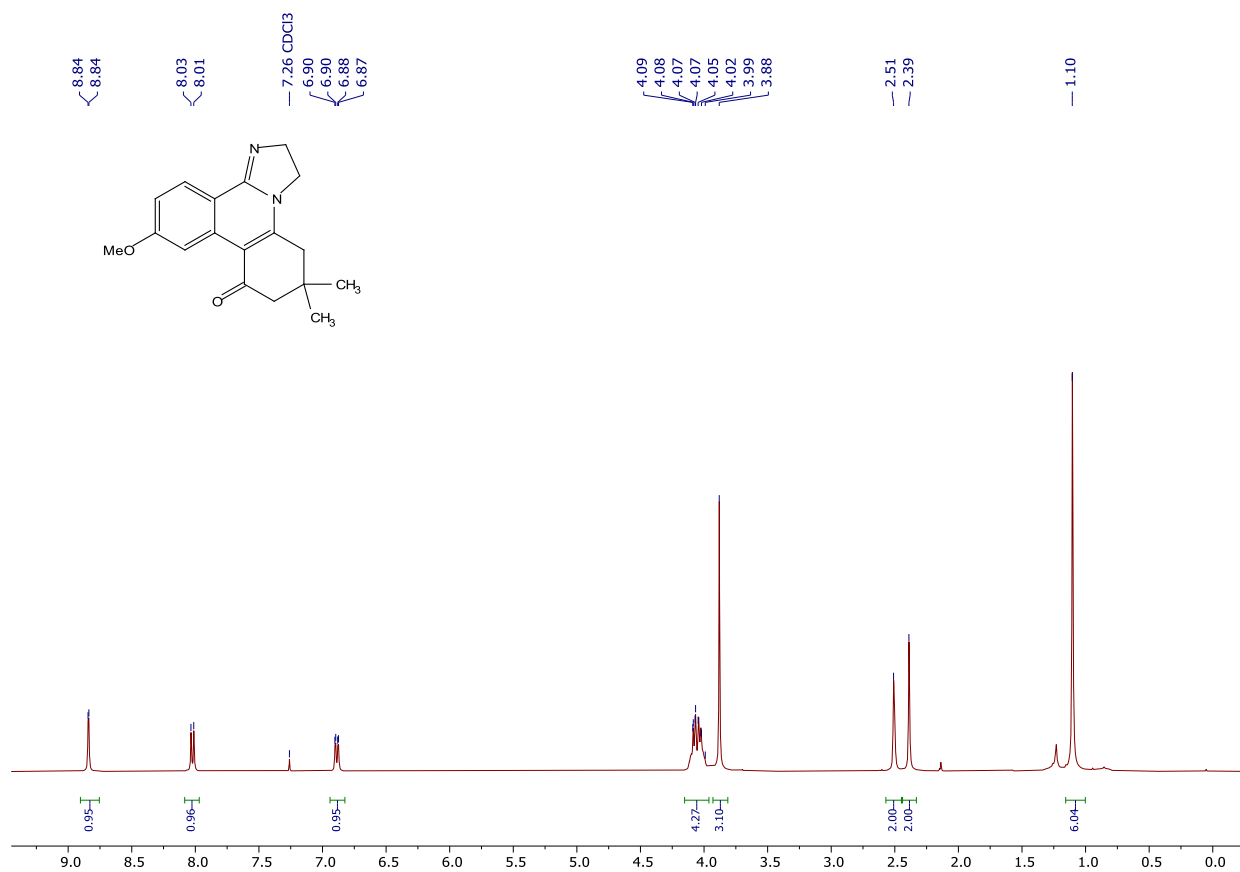

Copy of  $^{13}\text{C}\{^1\text{H}\}$  (100.61 MHz,  $\text{CDCl}_3$ ) NMR spectrum of **4b**

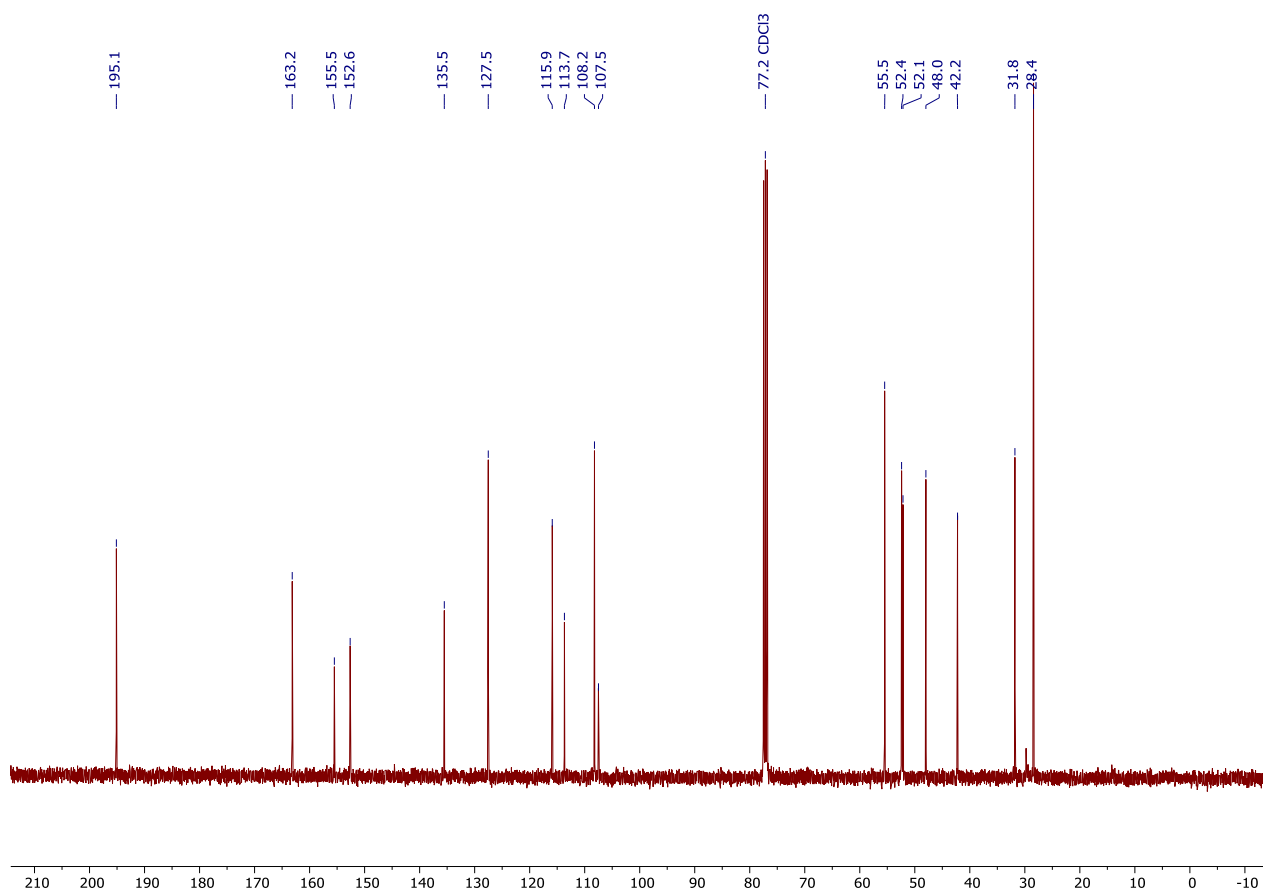

Copy of  $^1\text{H}$  (400.13 MHz,  $\text{CDCl}_3$ ) NMR spectrum of **4c**

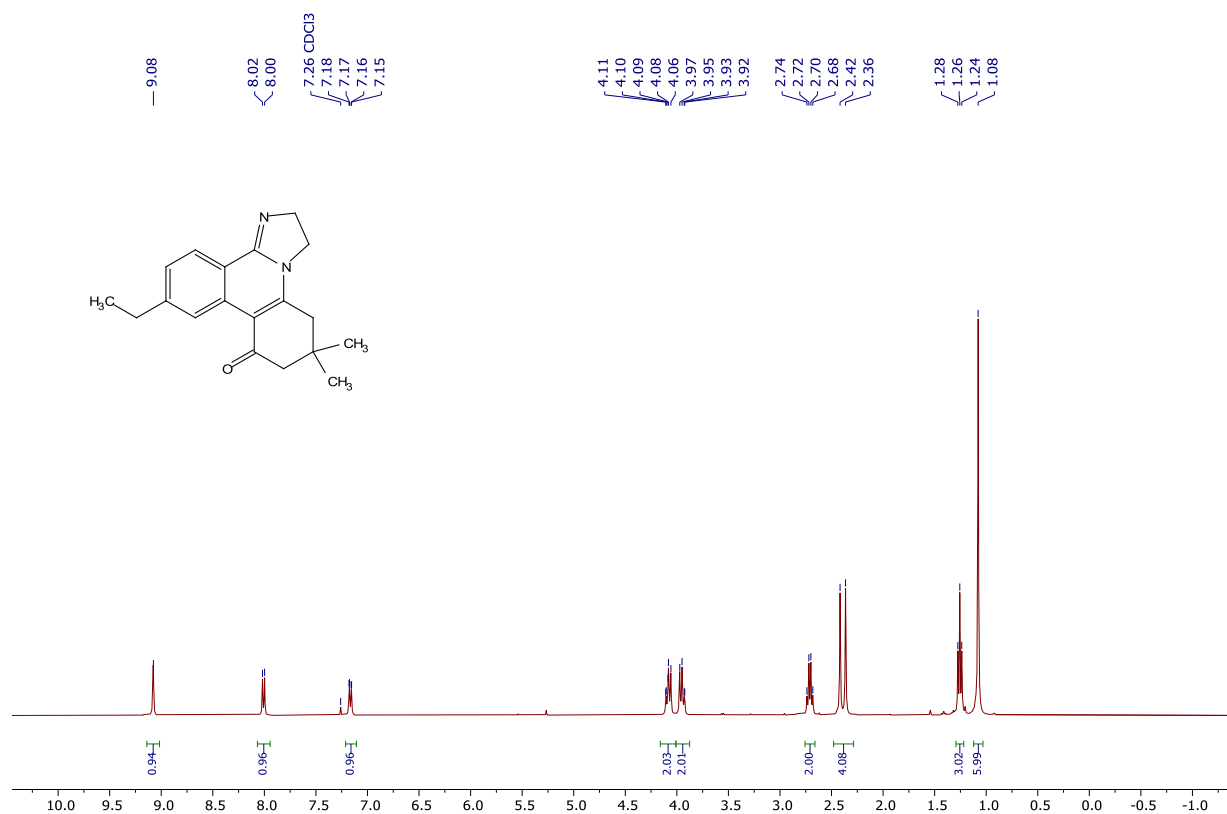

Copy of  $^{13}\text{C}\{^1\text{H}\}$  (100.61 MHz,  $\text{CDCl}_3$ ) NMR spectrum of **4c**

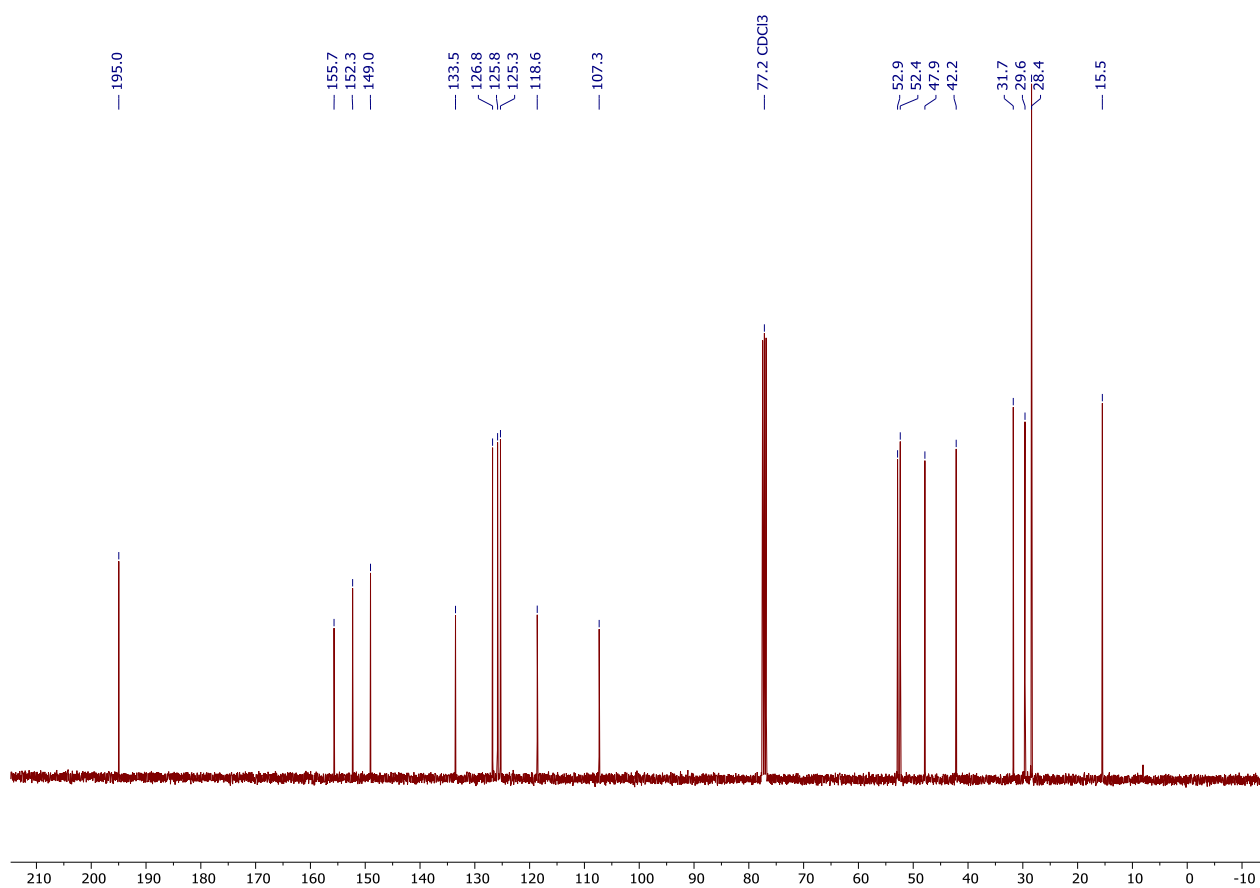

Copy of  $^1\text{H}$  (400.13 MHz,  $\text{DMSO-}d_6$ ) NMR spectrum of **4d**

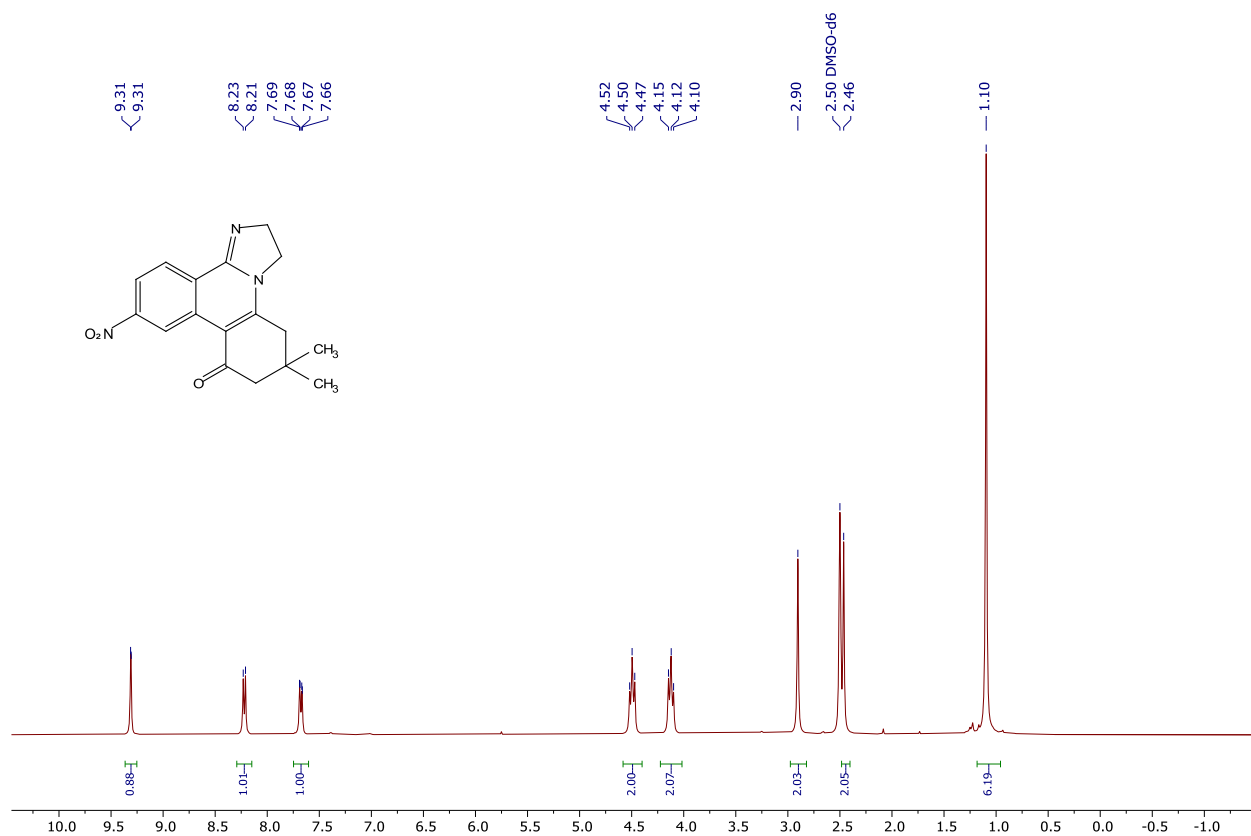

Copy of  $^{13}\text{C}\{^1\text{H}\}$  (100.61 MHz,  $\text{DMSO-}d_6$ ) NMR spectrum of **4d**

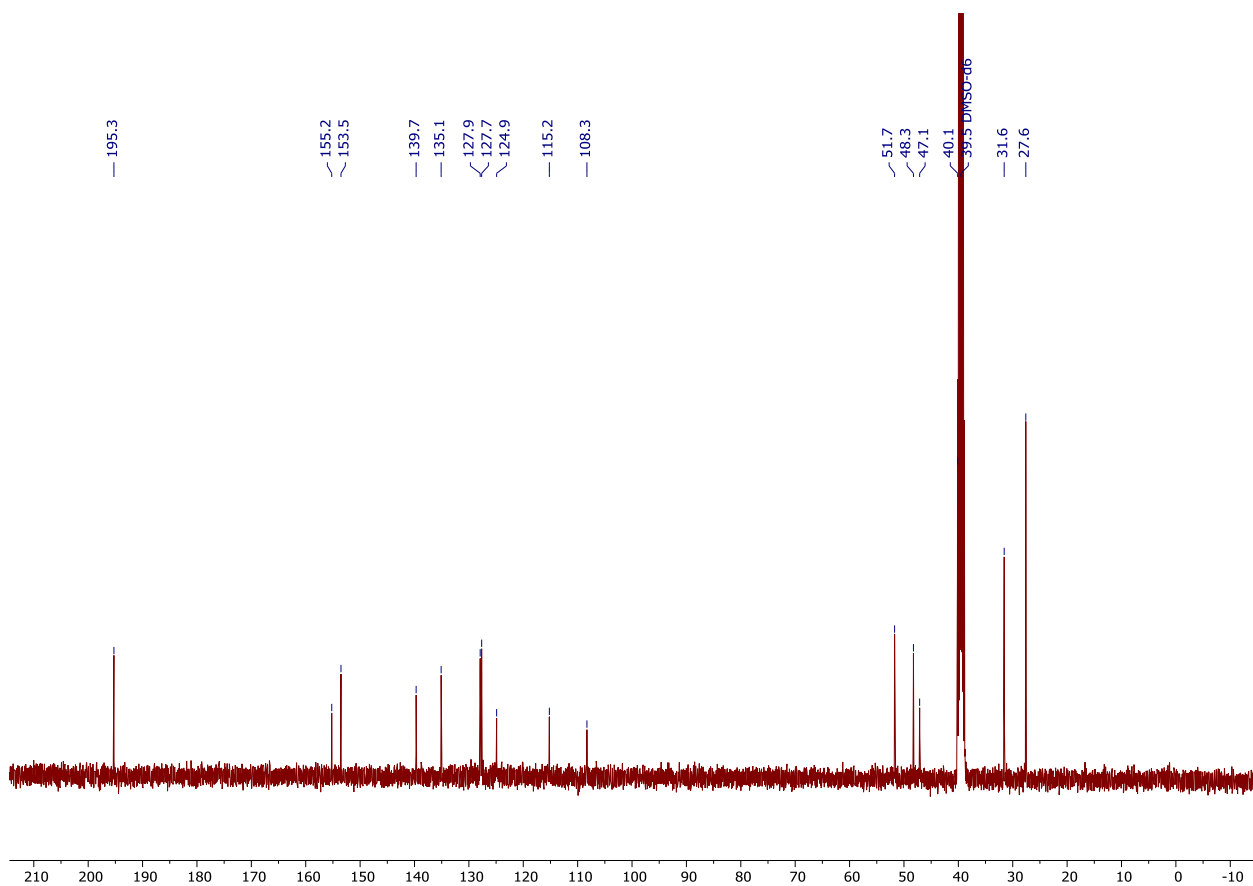

Copy of  $^1\text{H}$  (400.13 MHz,  $\text{CDCl}_3$ ) NMR spectrum of **4e**

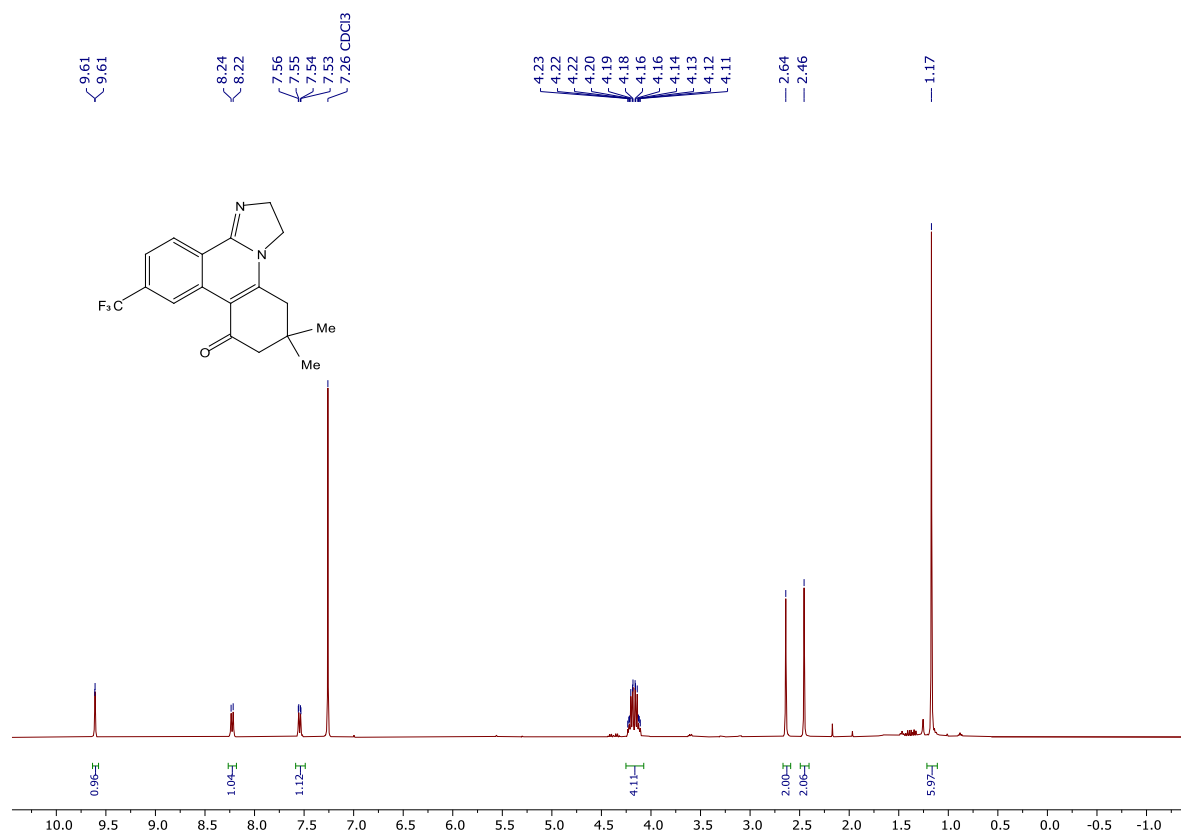

Copy of  $^{13}\text{C}\{^1\text{H}\}$  (100.61 MHz,  $\text{CDCl}_3$ ) NMR spectrum of **4e**

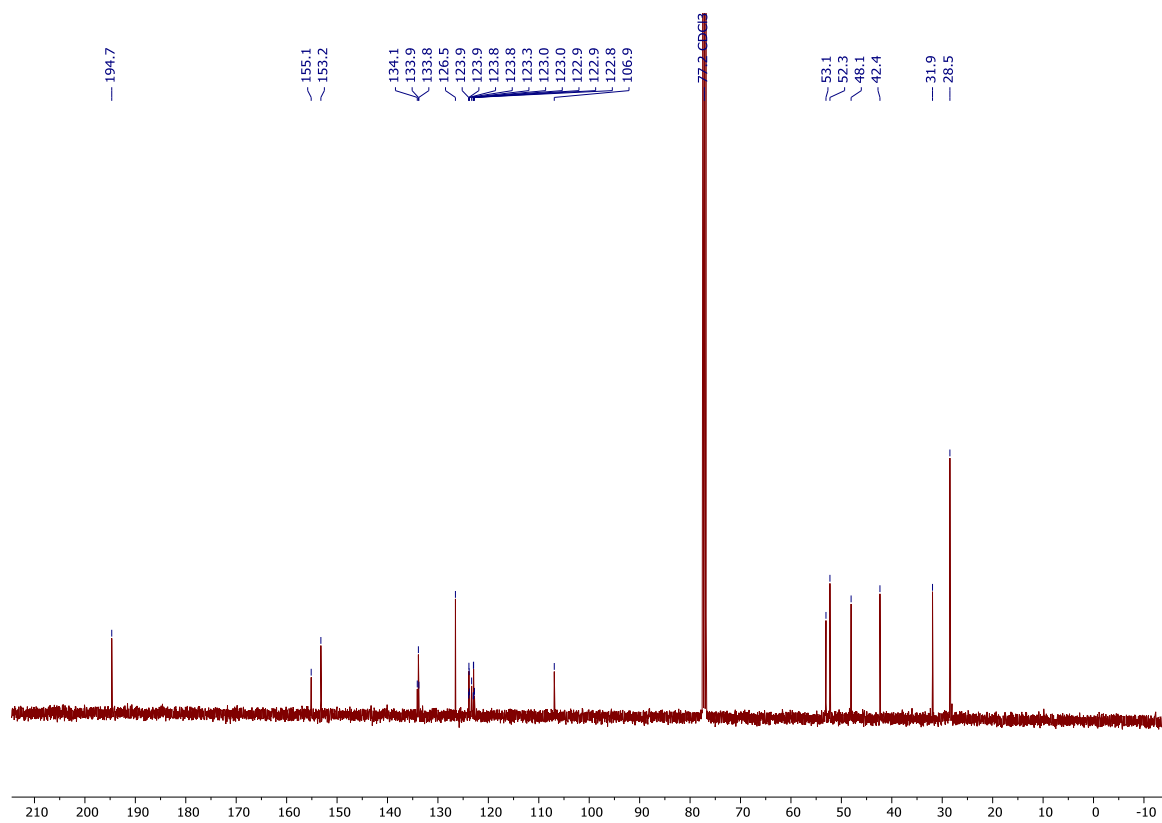

Copy of  $^{19}\text{F}\{^1\text{H}\}$  (376.50 MHz,  $\text{CDCl}_3$ ) NMR spectrum of **4e**

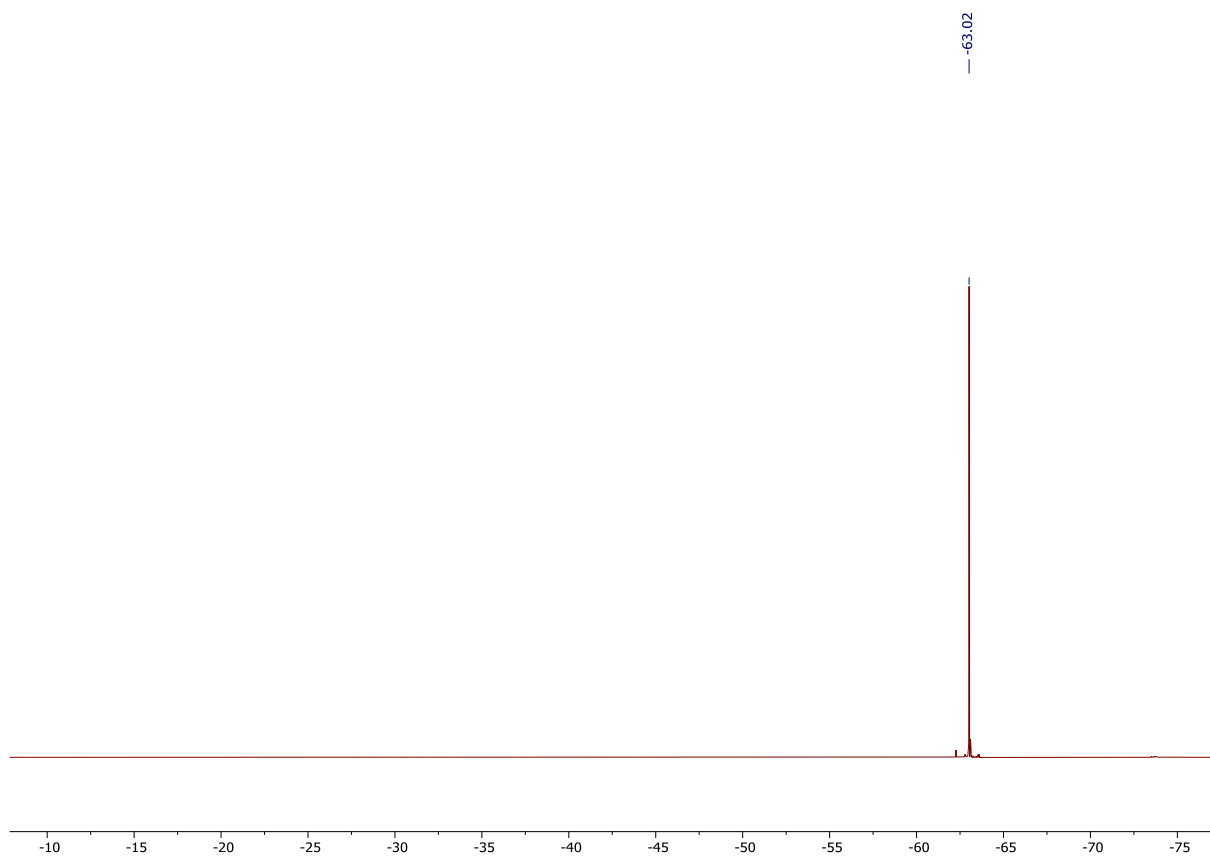

Copy of  $^1\text{H}$  (400.13 MHz,  $\text{CDCl}_3$ )  $^{19}\text{F}\{^1\text{H}\}$  (376.50 MHz,  $\text{CDCl}_3$ ) NMR spectrum of **4f**

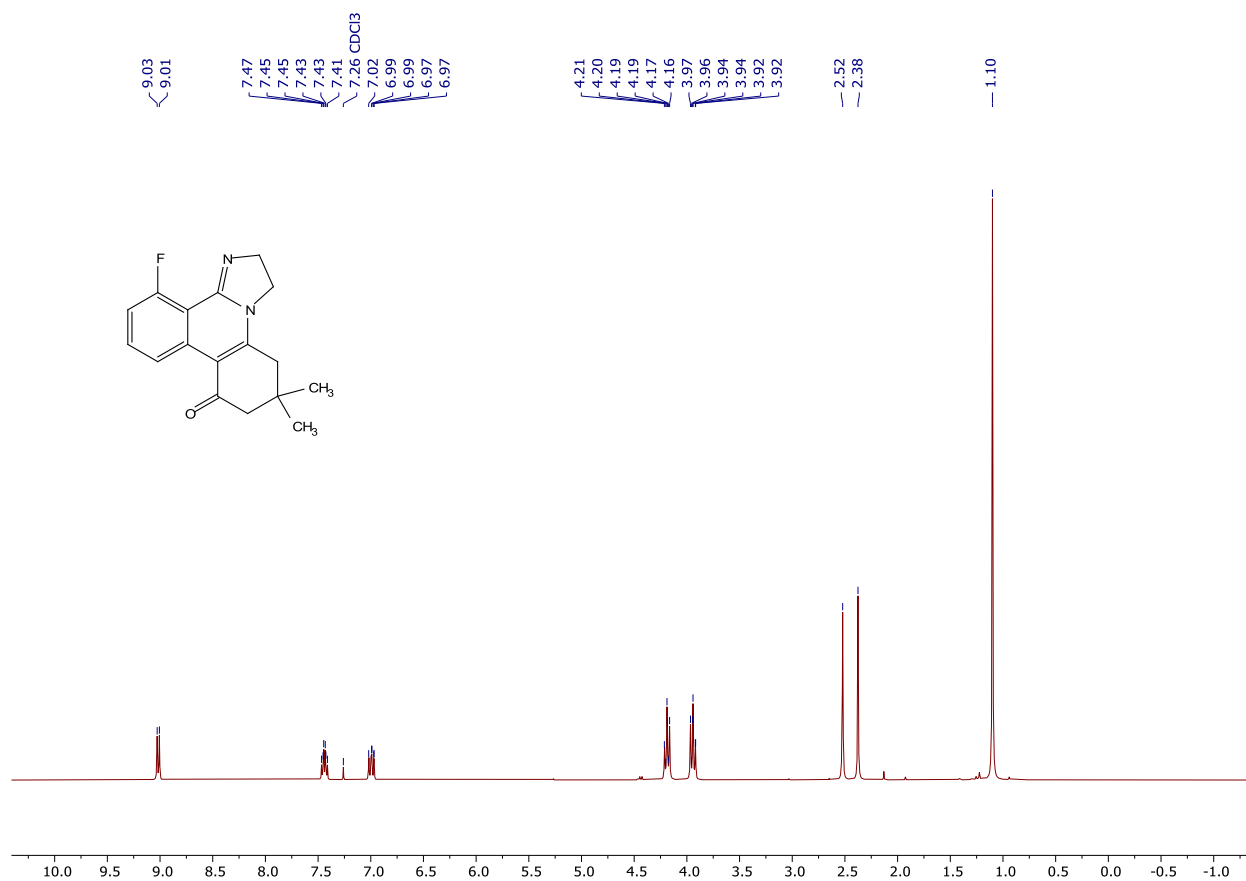

Copy of  $^{13}\text{C}\{^1\text{H}\}$  (100.61 MHz,  $\text{CDCl}_3$ ) NMR spectrum of **4f**

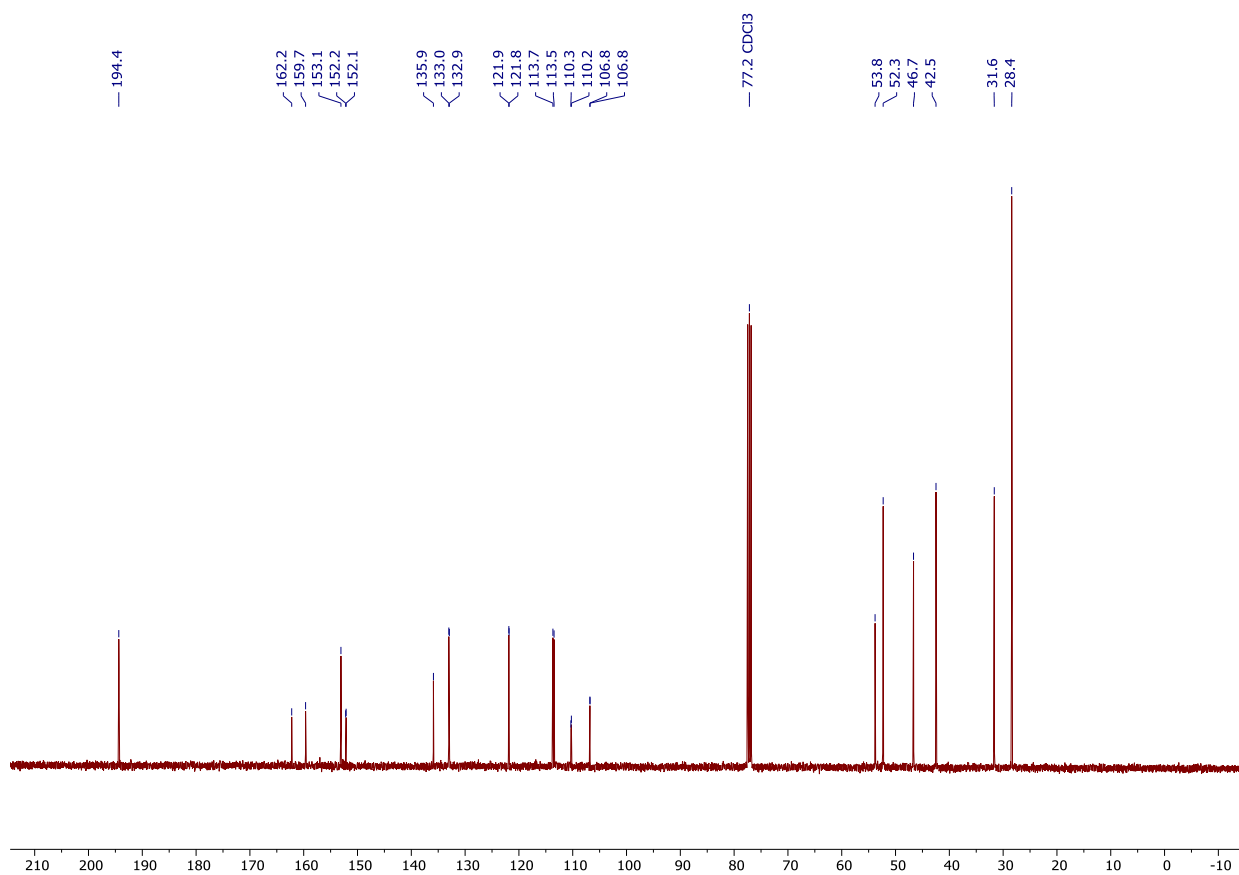

Copy of  $^{19}\text{F}\{^1\text{H}\}$  (376.50 MHz,  $\text{CDCl}_3$ ) NMR spectrum of **4f**

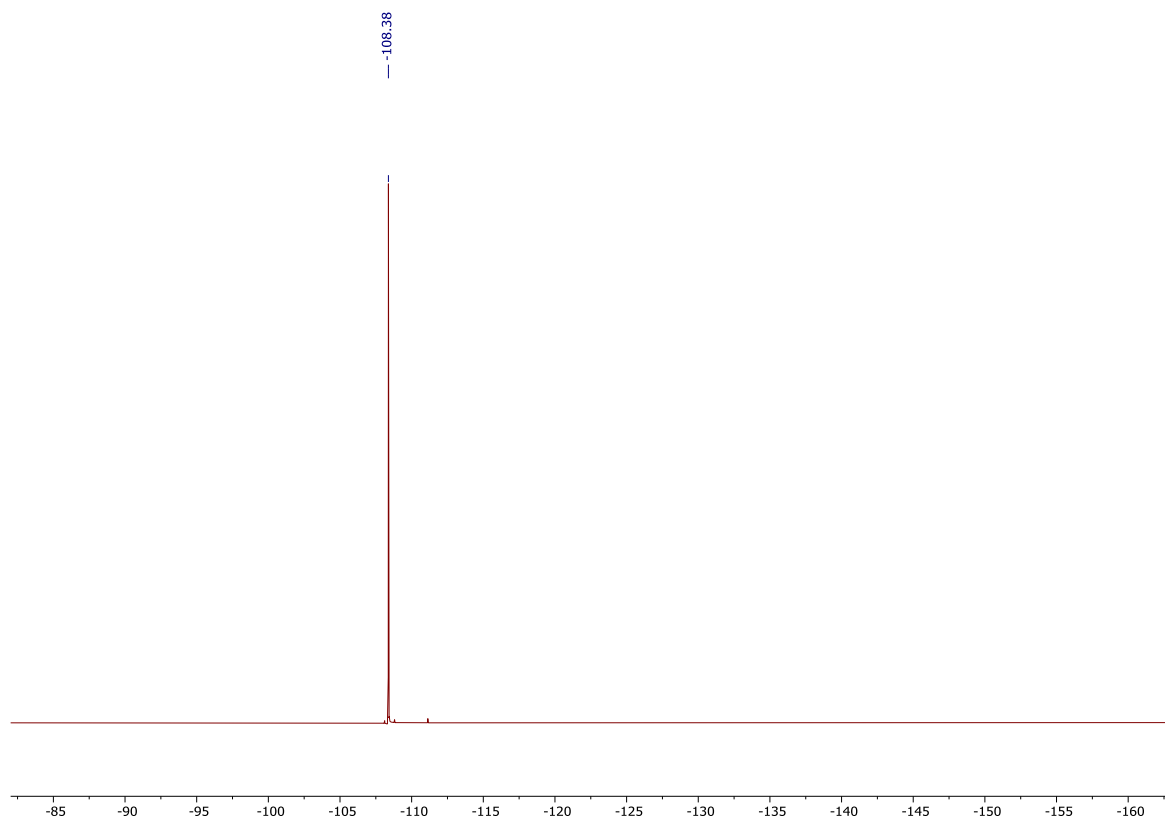

Copy of  $^1\text{H}$  (400.13 MHz,  $\text{CDCl}_3$ ) NMR spectrum of **4g + g'**

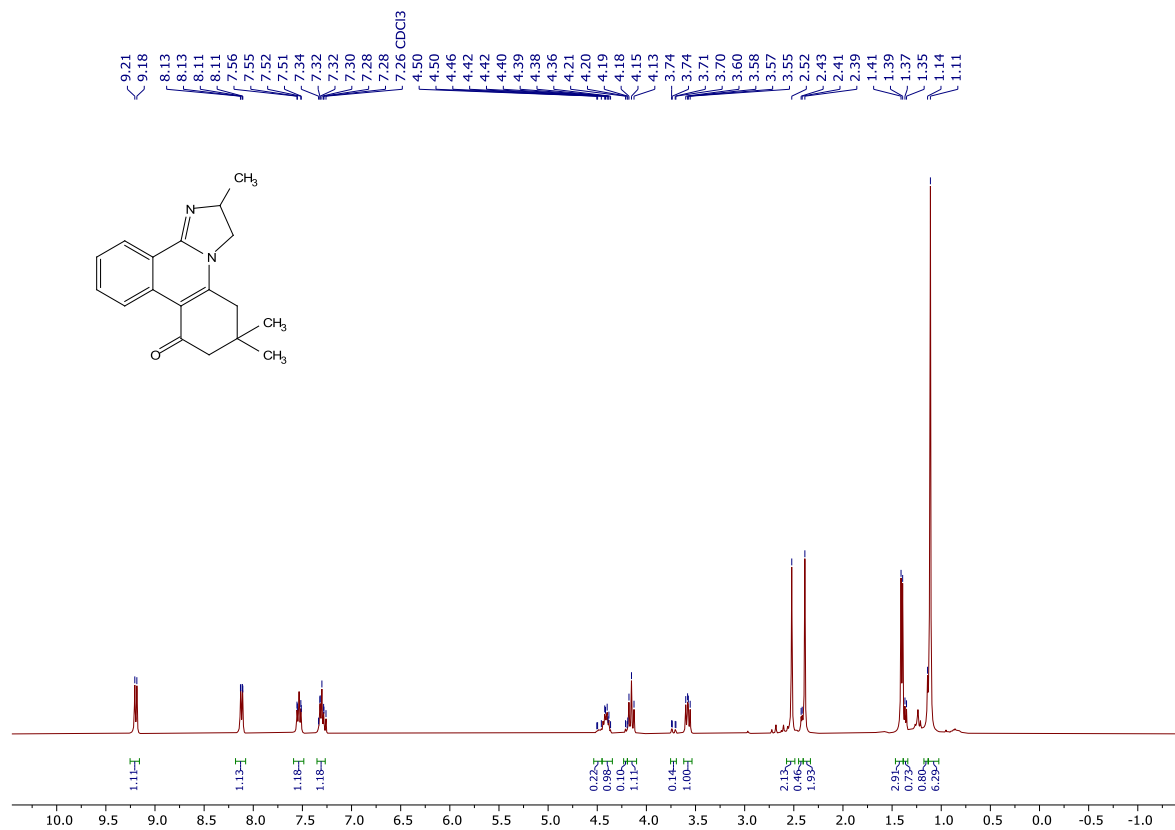

Copy of  $^{13}\text{C}\{^1\text{H}\}$  (100.61 MHz,  $\text{CDCl}_3$ ) NMR spectrum of **4g + g'**

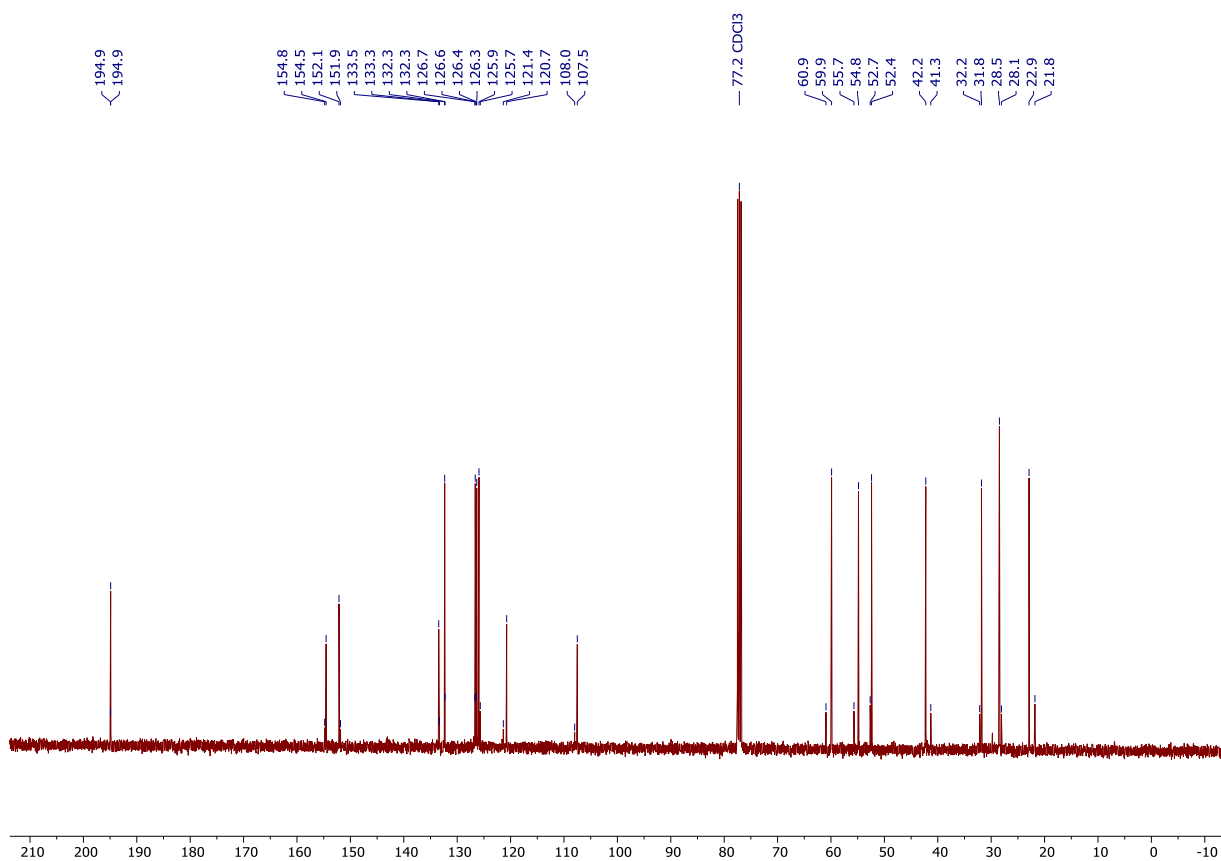

Copy of NOESY (400.13 MHz, CDCl<sub>3</sub>) NMR spectrum of **4g** + **g'**

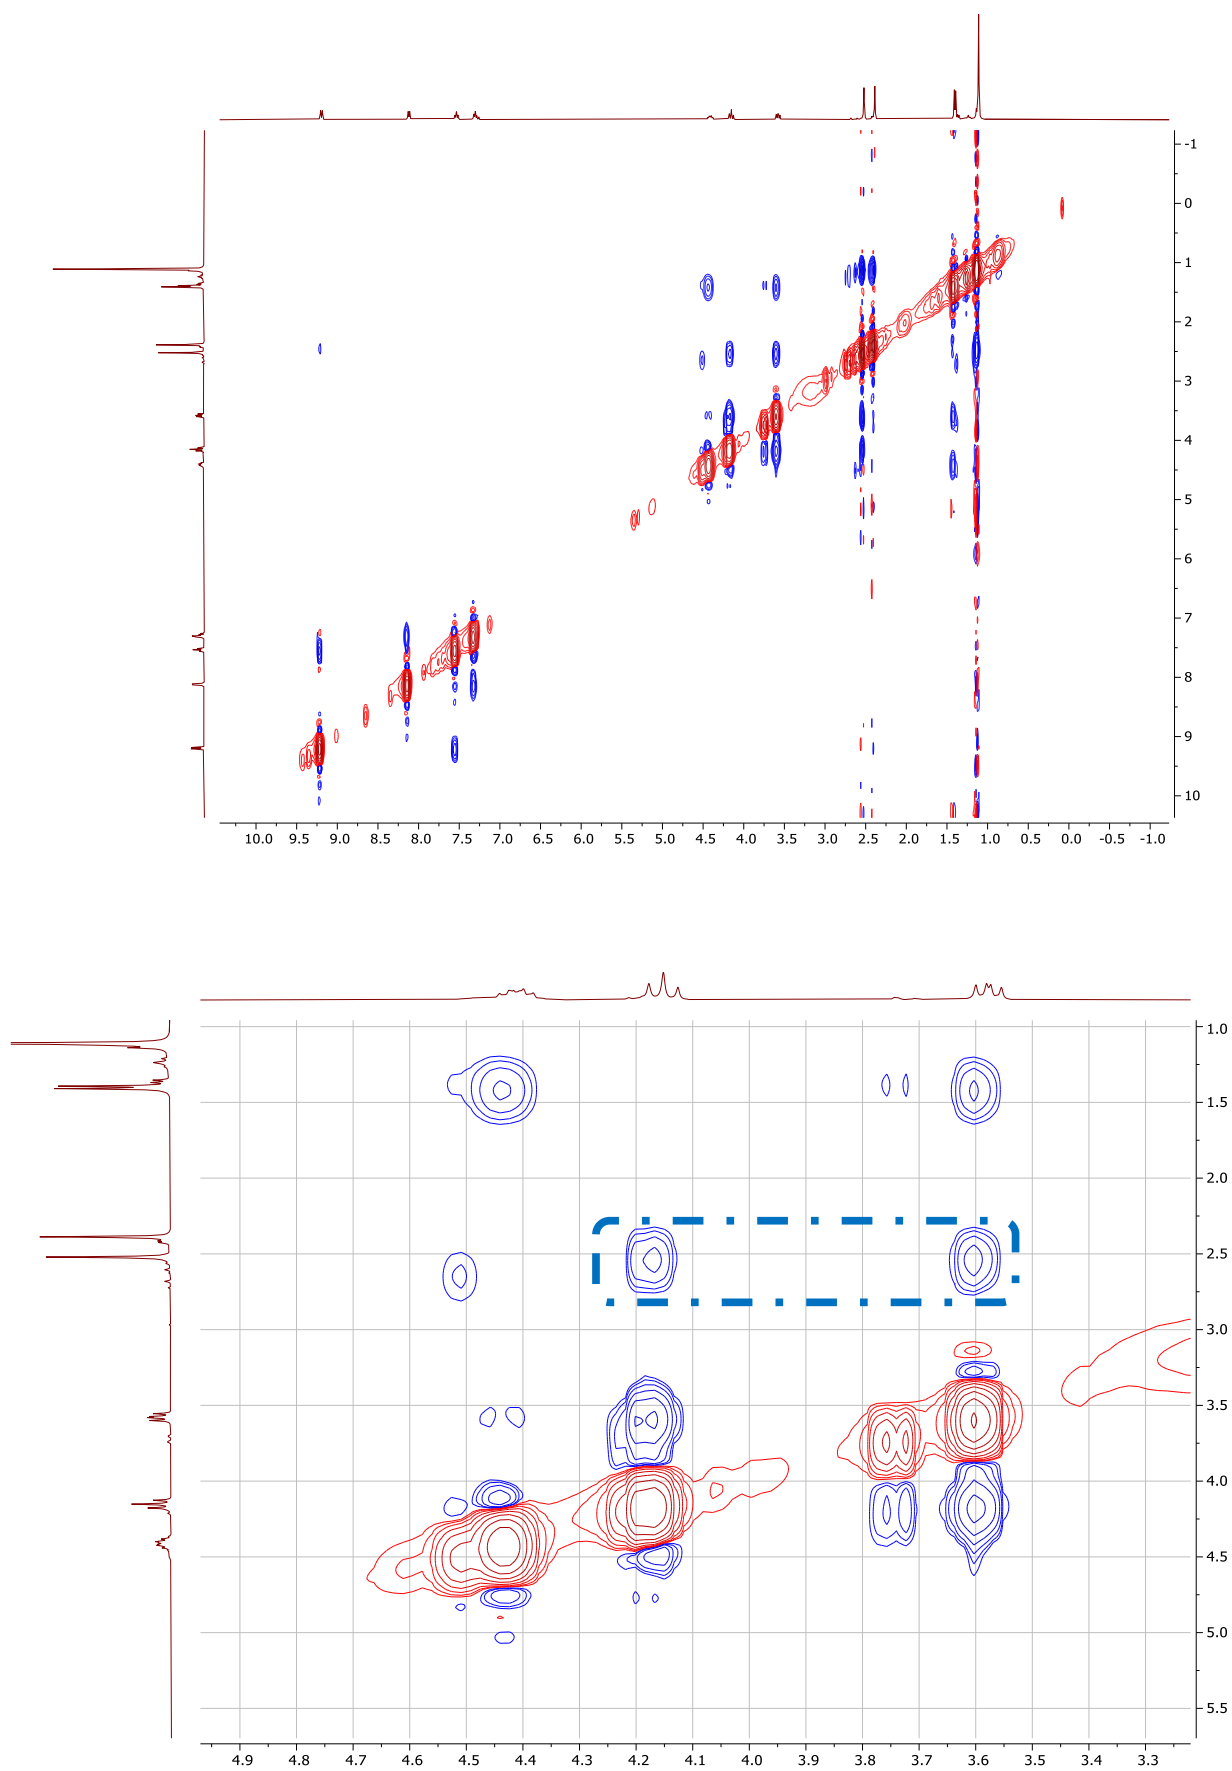

Copy of  $^1\text{H}$  (400.13 MHz,  $\text{CDCl}_3$ ) NMR spectrum of **4h**

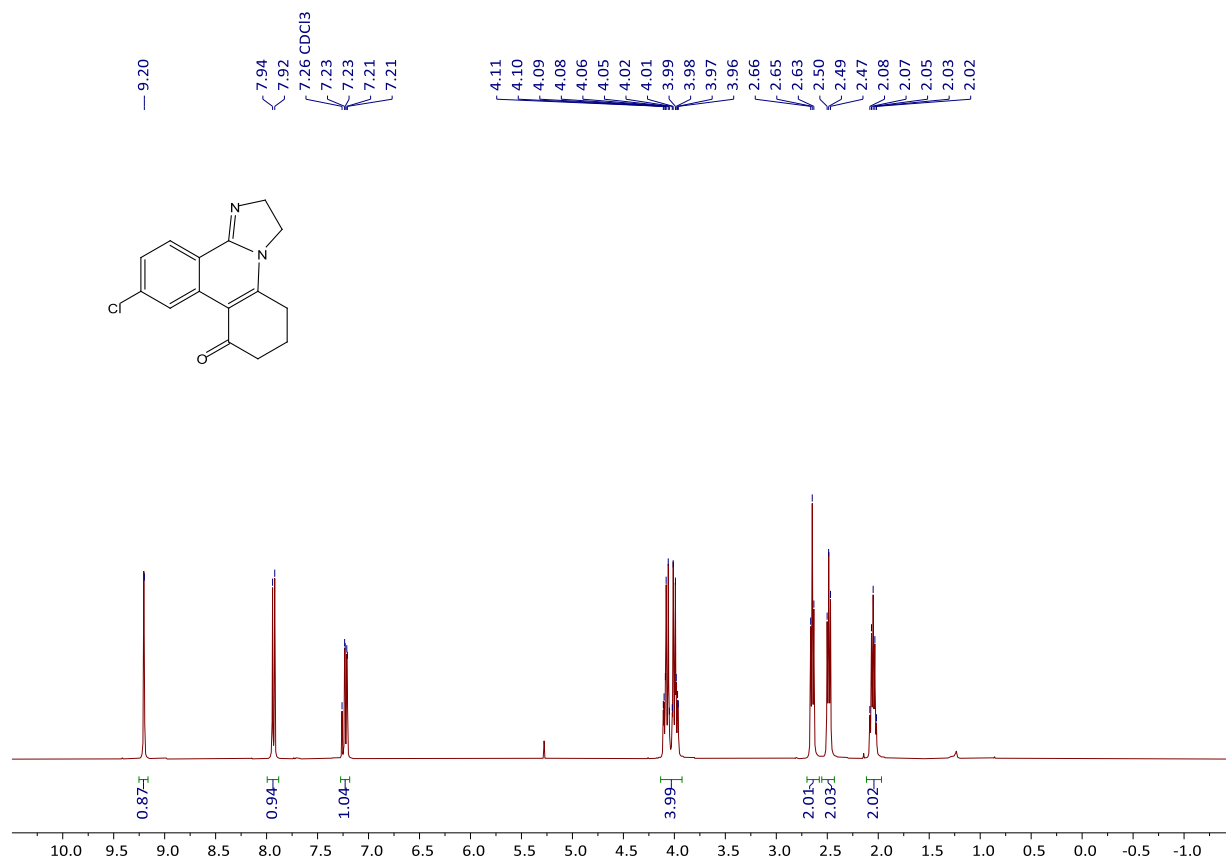

Copy of  $^{13}\text{C}\{^1\text{H}\}$  (100.61 MHz,  $\text{CDCl}_3$ ) NMR spectrum of **4h**

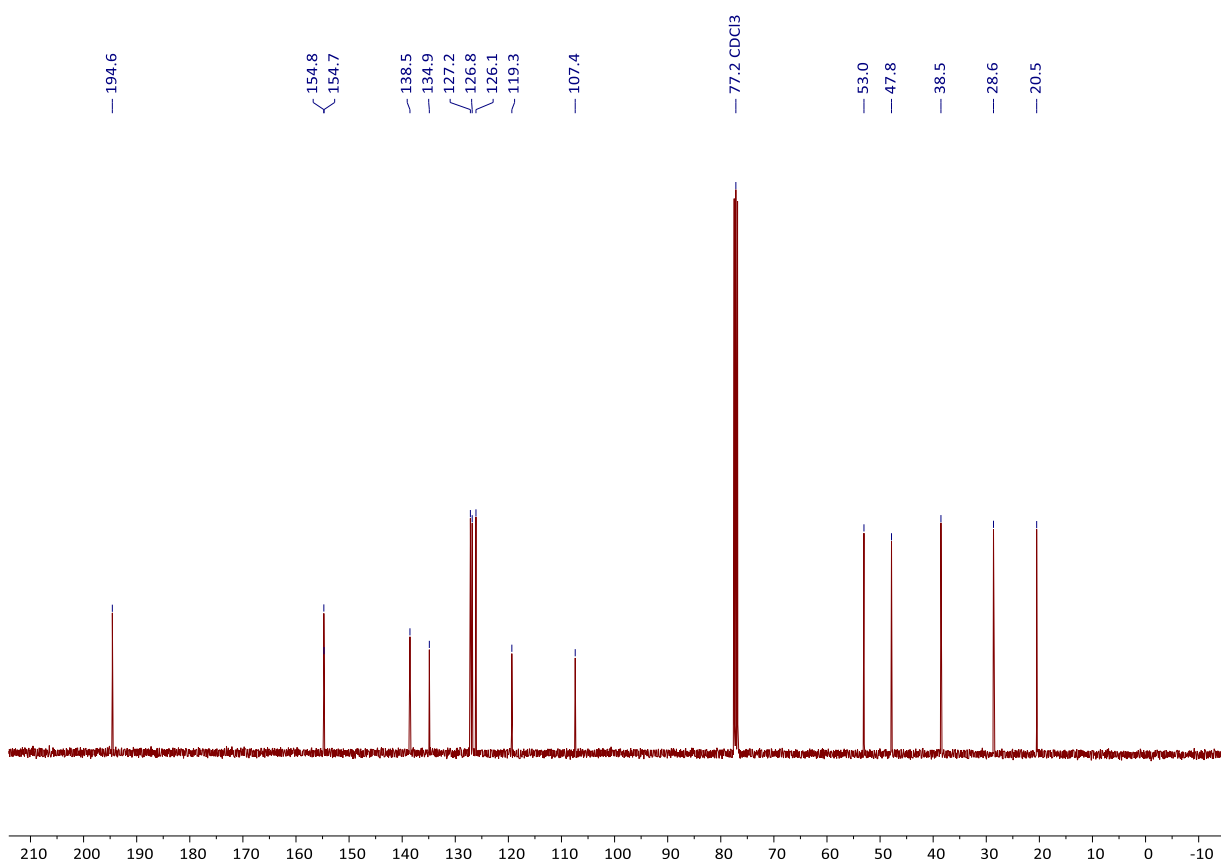

Copy of  $^1\text{H}$  (400.13 MHz,  $\text{CDCl}_3$ ) NMR spectrum of **4i**

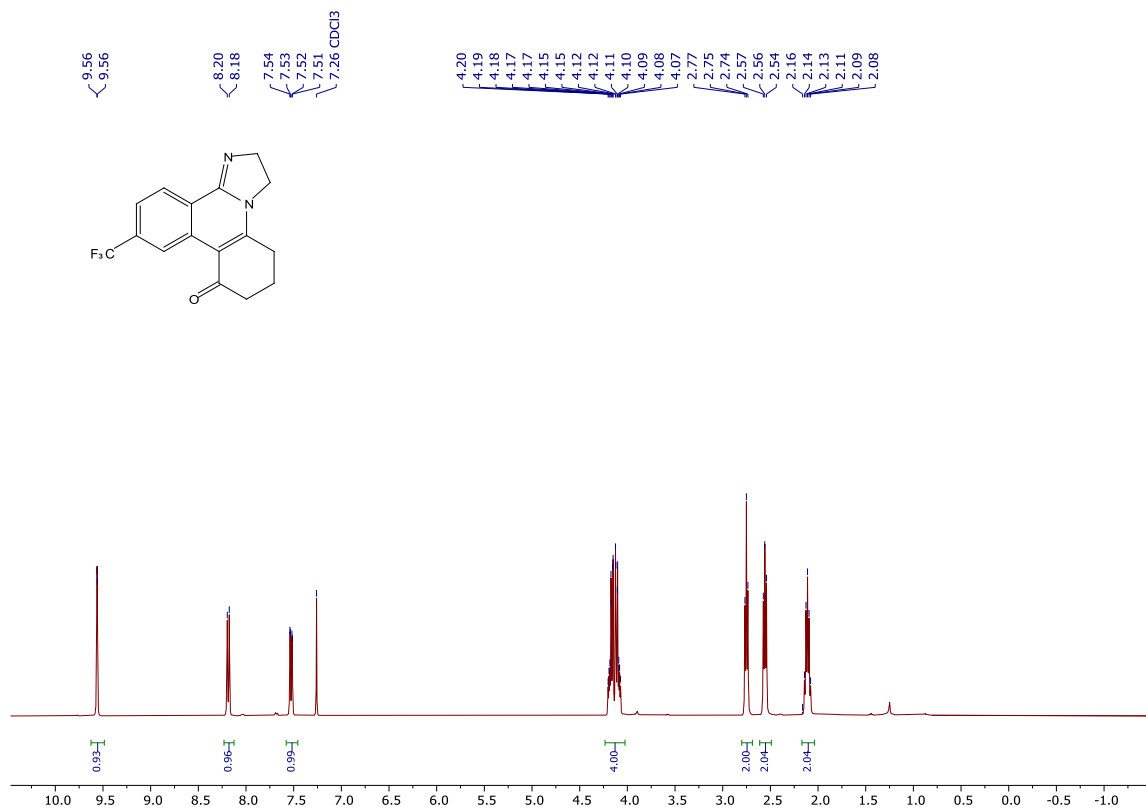

Copy of  $^{13}\text{C}\{^1\text{H}\}$  (100.61 MHz,  $\text{CDCl}_3$ ) vspectrum of **4i**

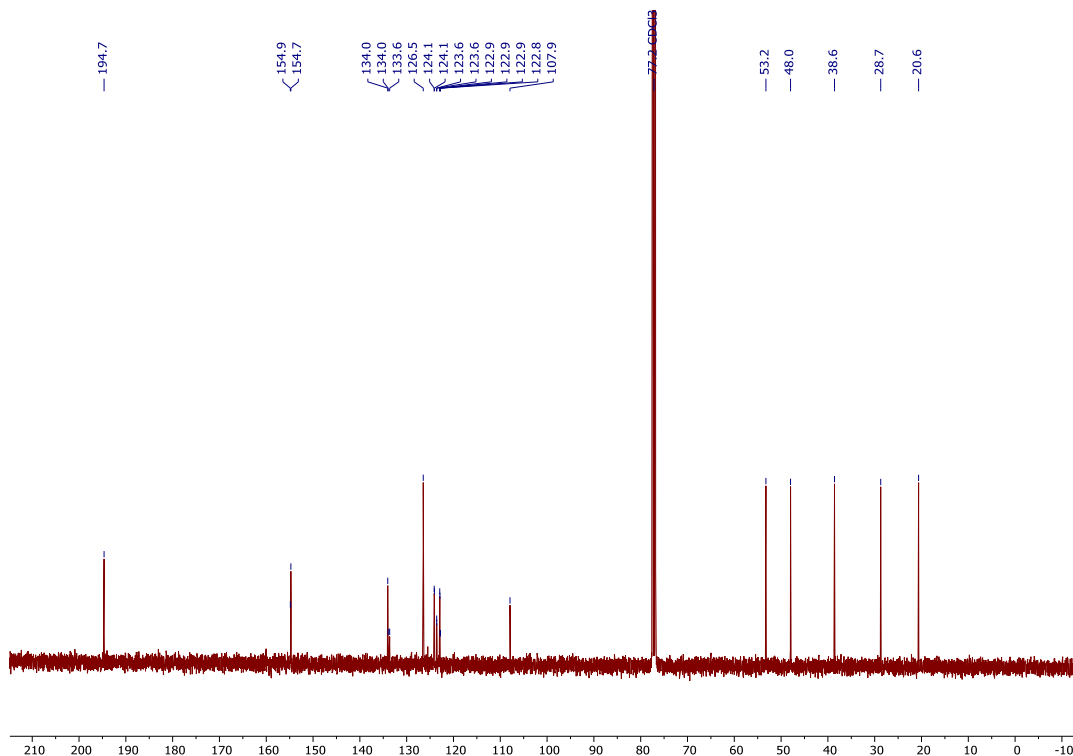

Copy of  $^{19}\text{F}\{^1\text{H}\}$  (376.50 MHz,  $\text{CDCl}_3$ ) NMR spectrum of **4i**

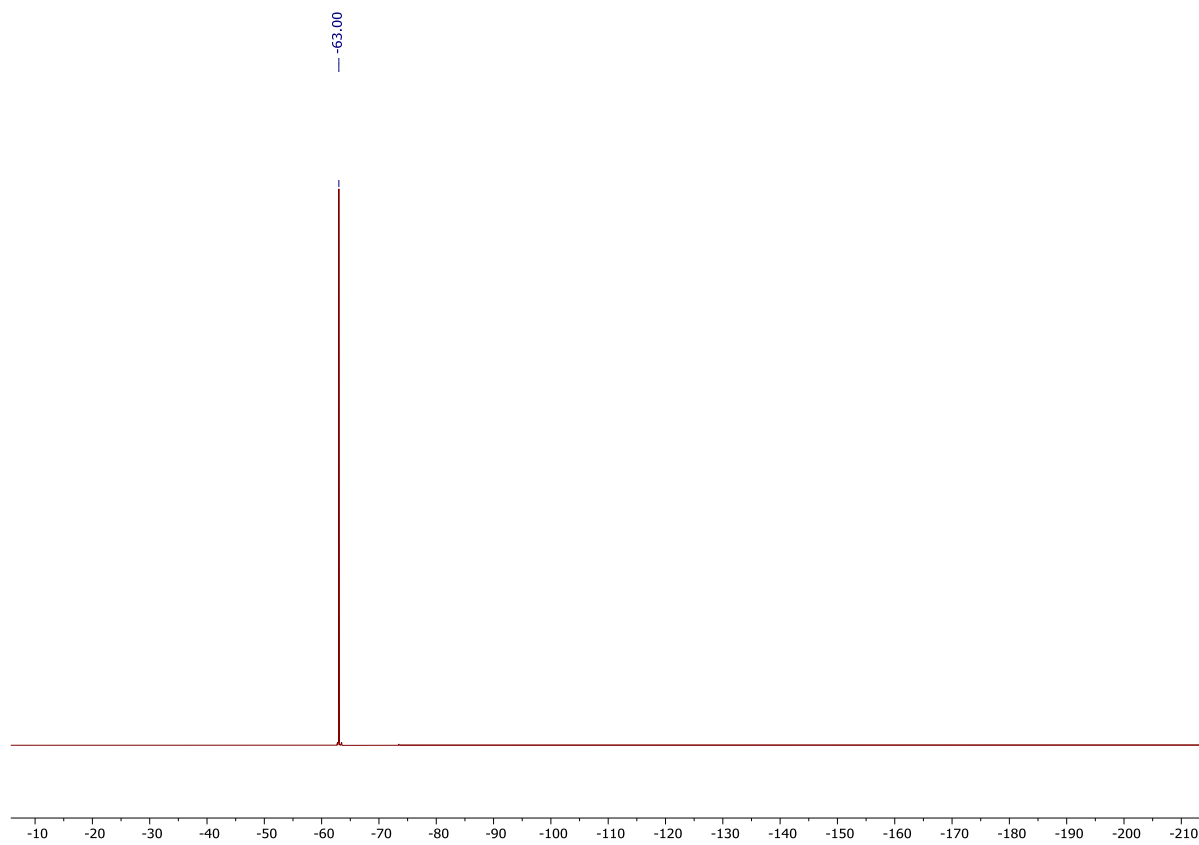

Copy of  $^1\text{H}$  (400.13 MHz,  $\text{CDCl}_3$ ) NMR spectrum of **4j**

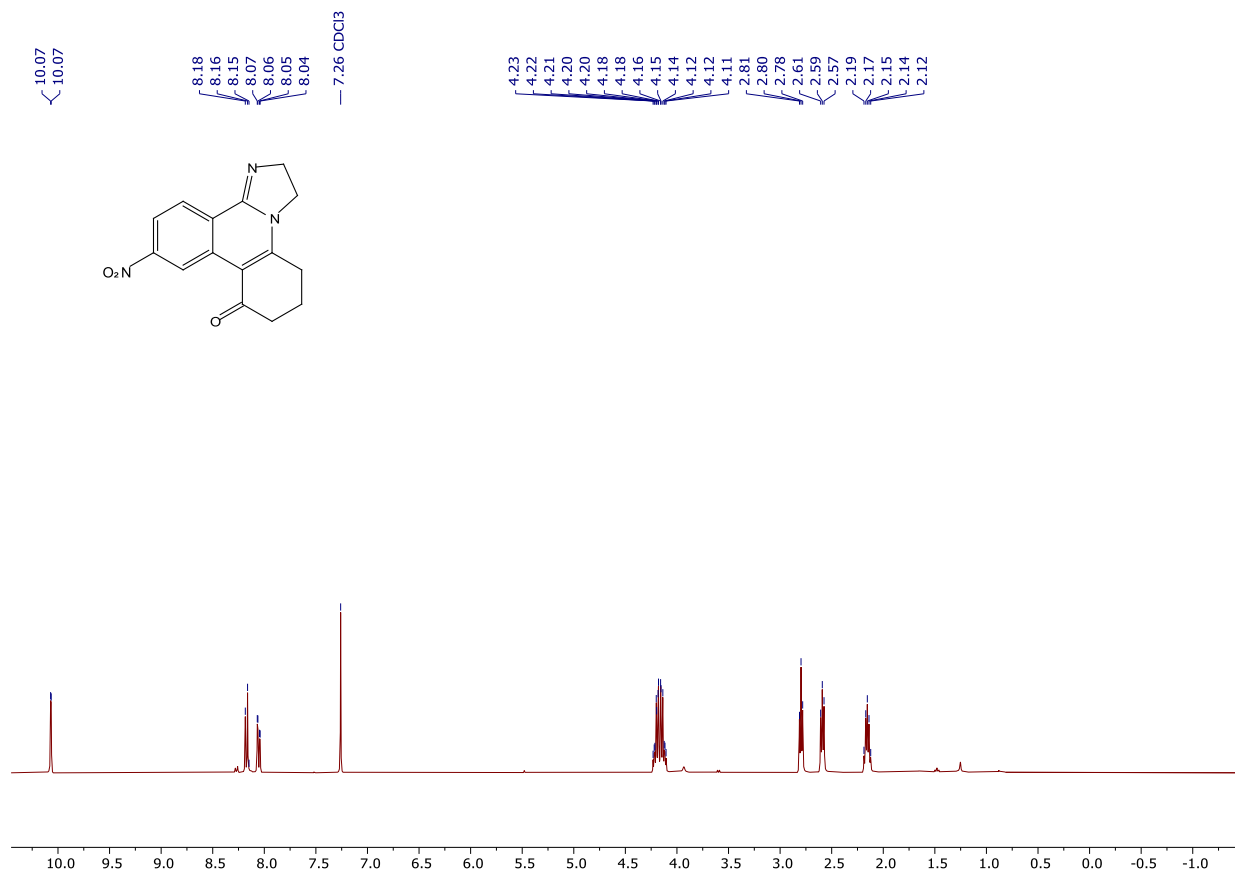

Copy of  $^{13}\text{C}\{^1\text{H}\}$  (100.61 MHz,  $\text{CDCl}_3$ ) NMR spectrum of **4j**

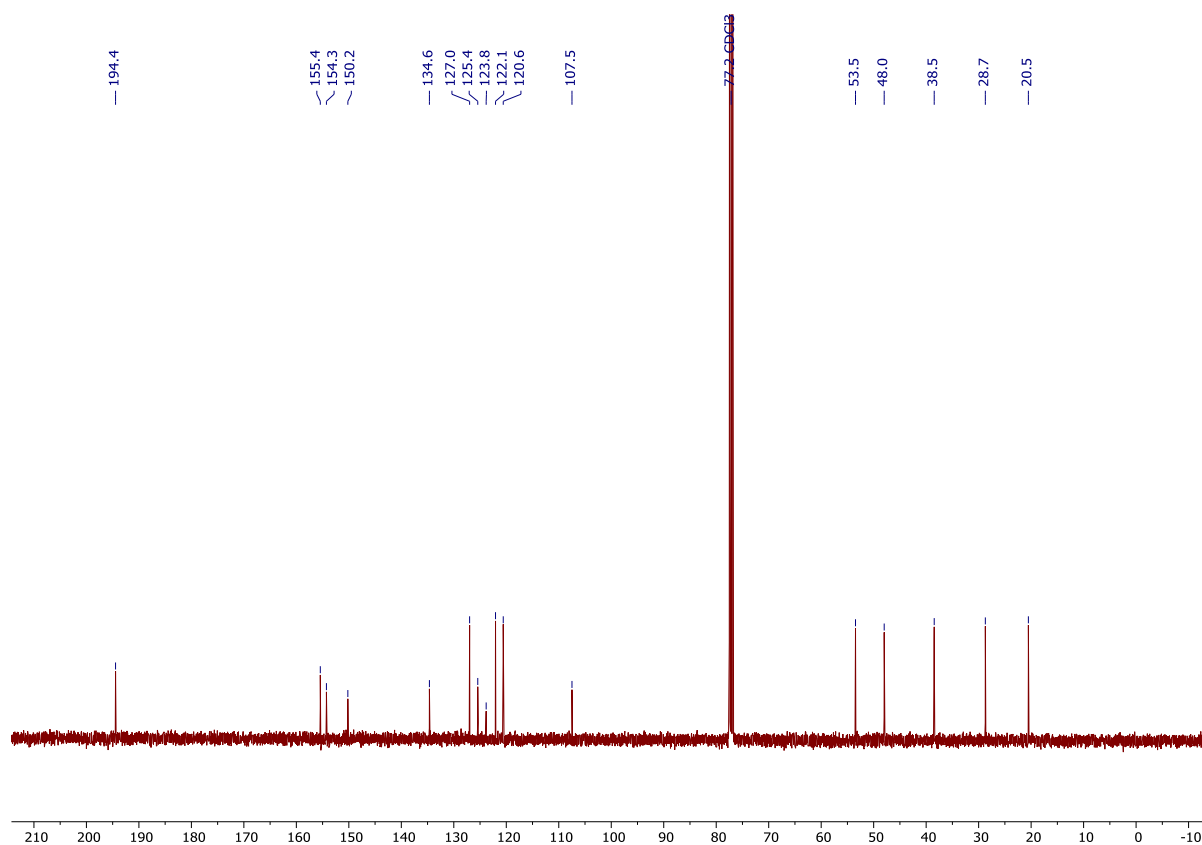

Copy of  $^1\text{H}$  (400.13 MHz,  $\text{CDCl}_3$ ) NMR spectrum of **4k**

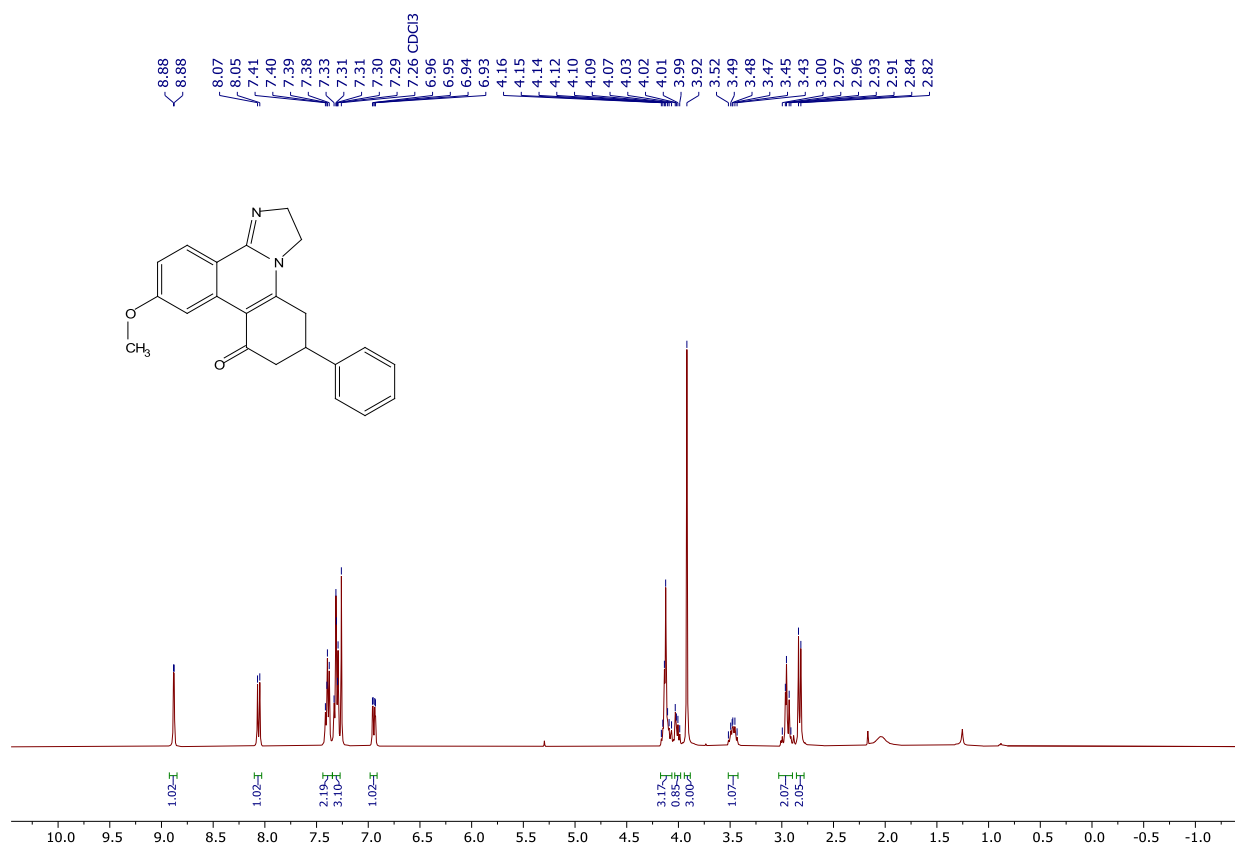

Copy of  $^{13}\text{C}\{^1\text{H}\}$  (100.61 MHz,  $\text{CDCl}_3$ ) NMR spectrum of **4k**

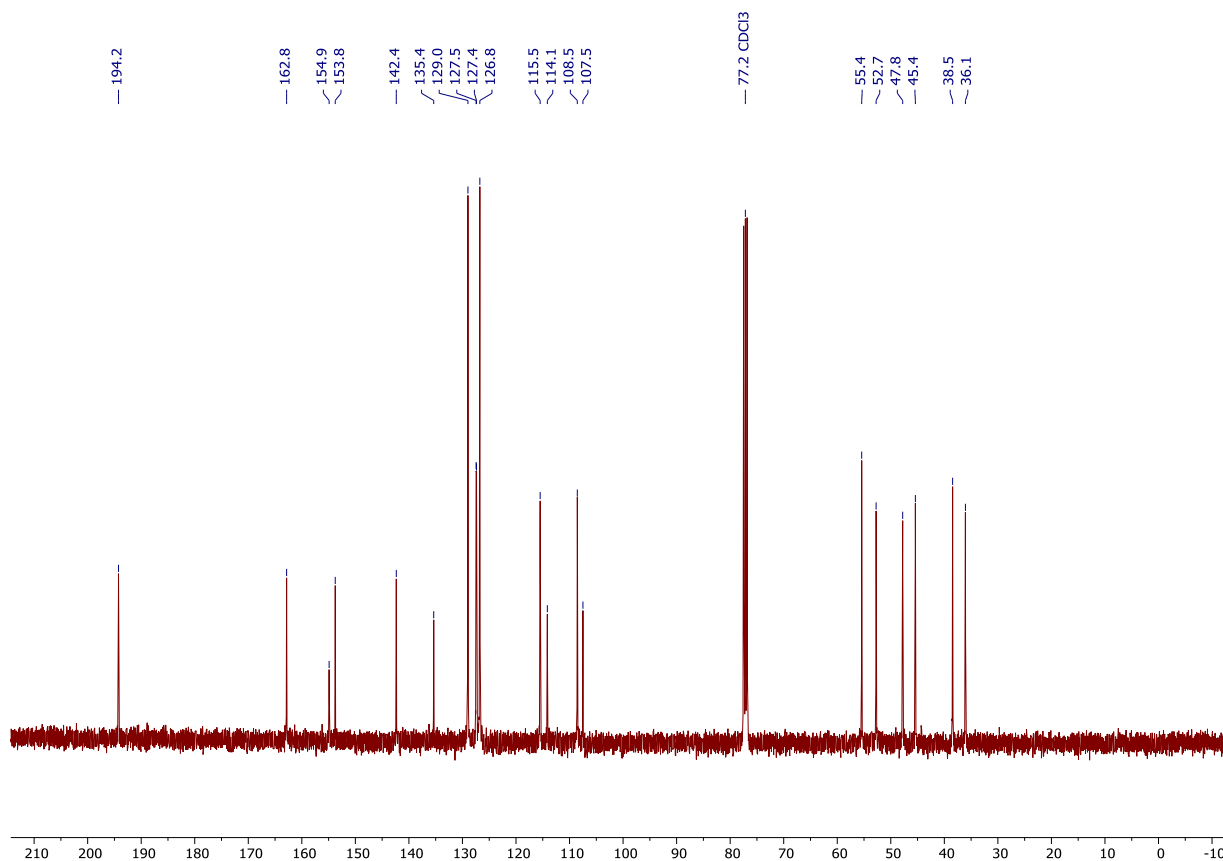

Copy of  $^1\text{H}$  (400.13 MHz,  $\text{CDCl}_3$ ) NMR spectrum of **4I**

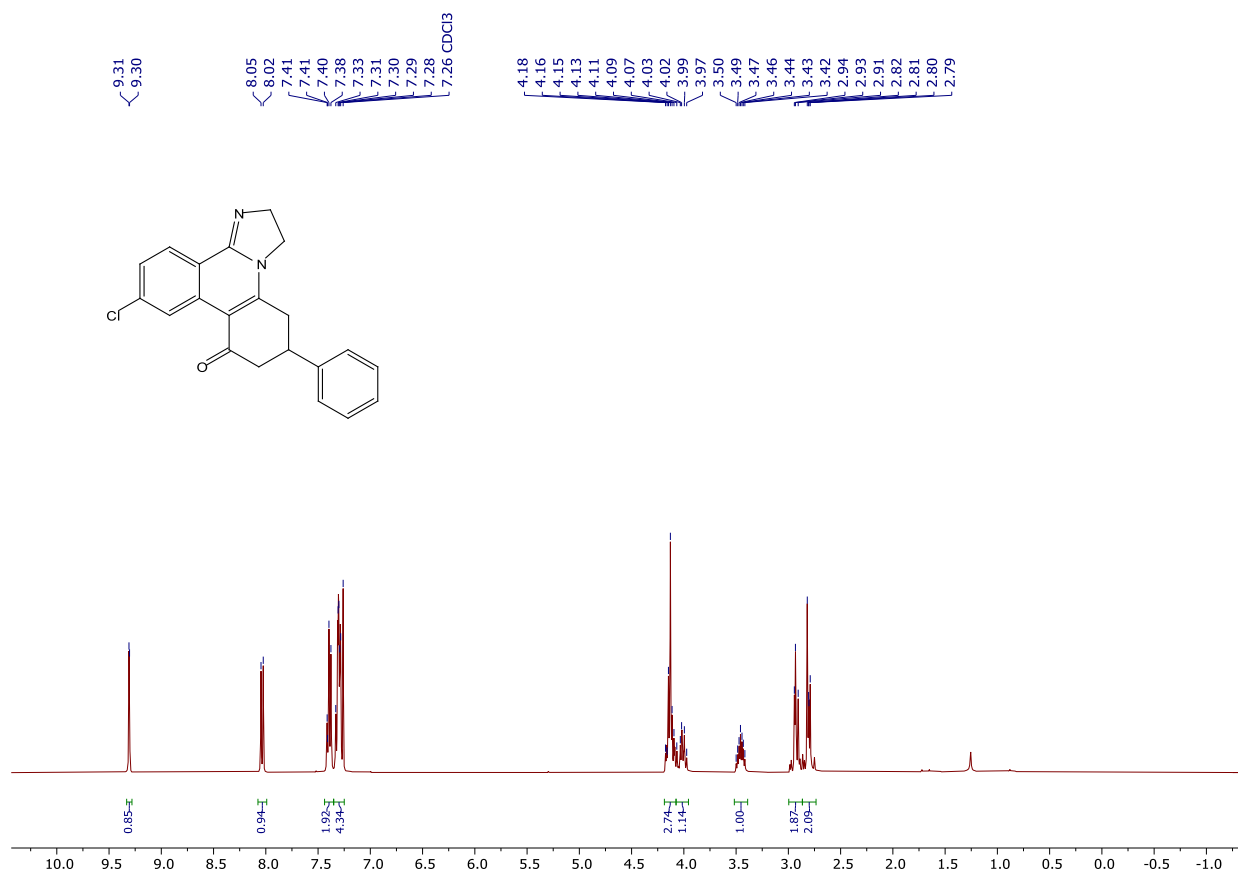

Copy of  $^{13}\text{C}\{^1\text{H}\}$  (100.61 MHz,  $\text{CDCl}_3$ ) NMR spectrum of **4I**

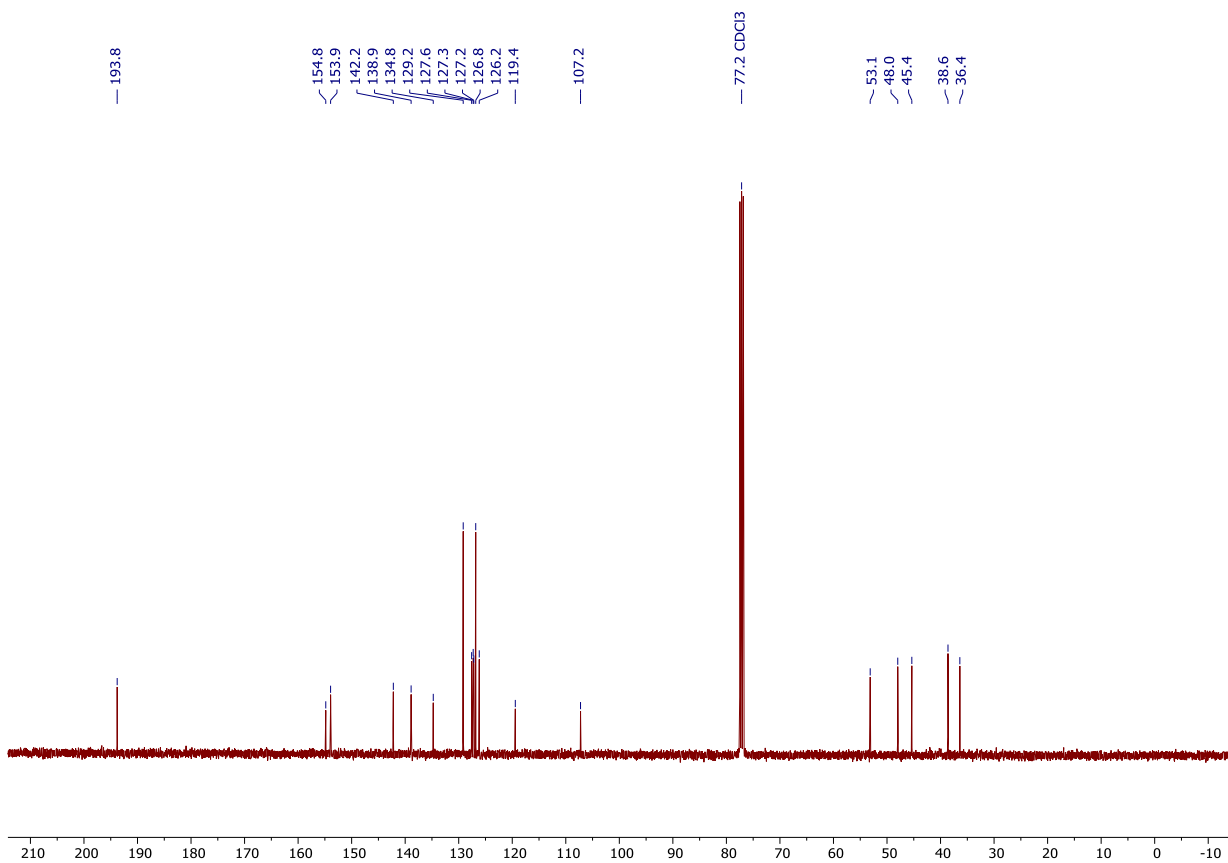

Copy of  $^1\text{H}$  (400.13 MHz,  $\text{CDCl}_3$ ) NMR spectrum of **4m**

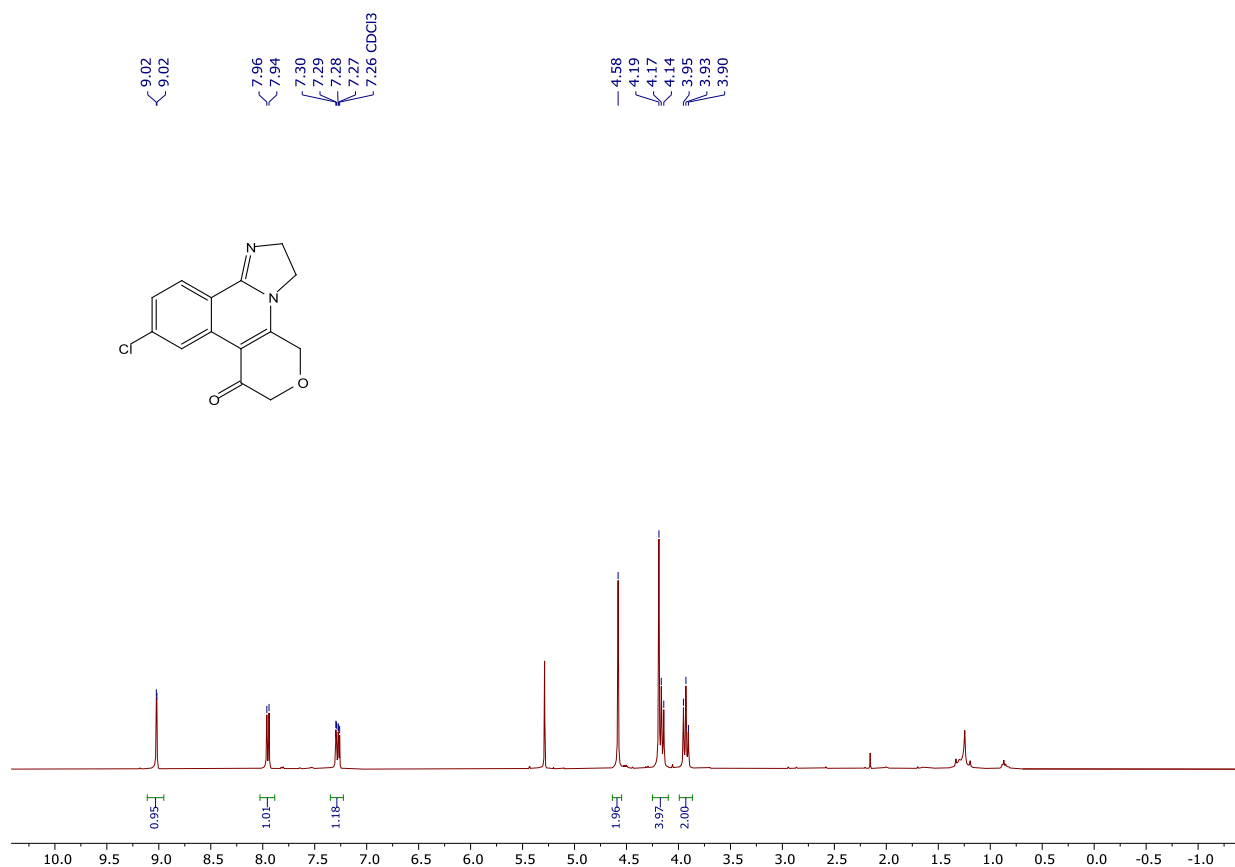

Copy of  $^{13}\text{C}\{^1\text{H}\}$  (100.61 MHz,  $\text{CDCl}_3$ ) NMR spectrum of **4m**

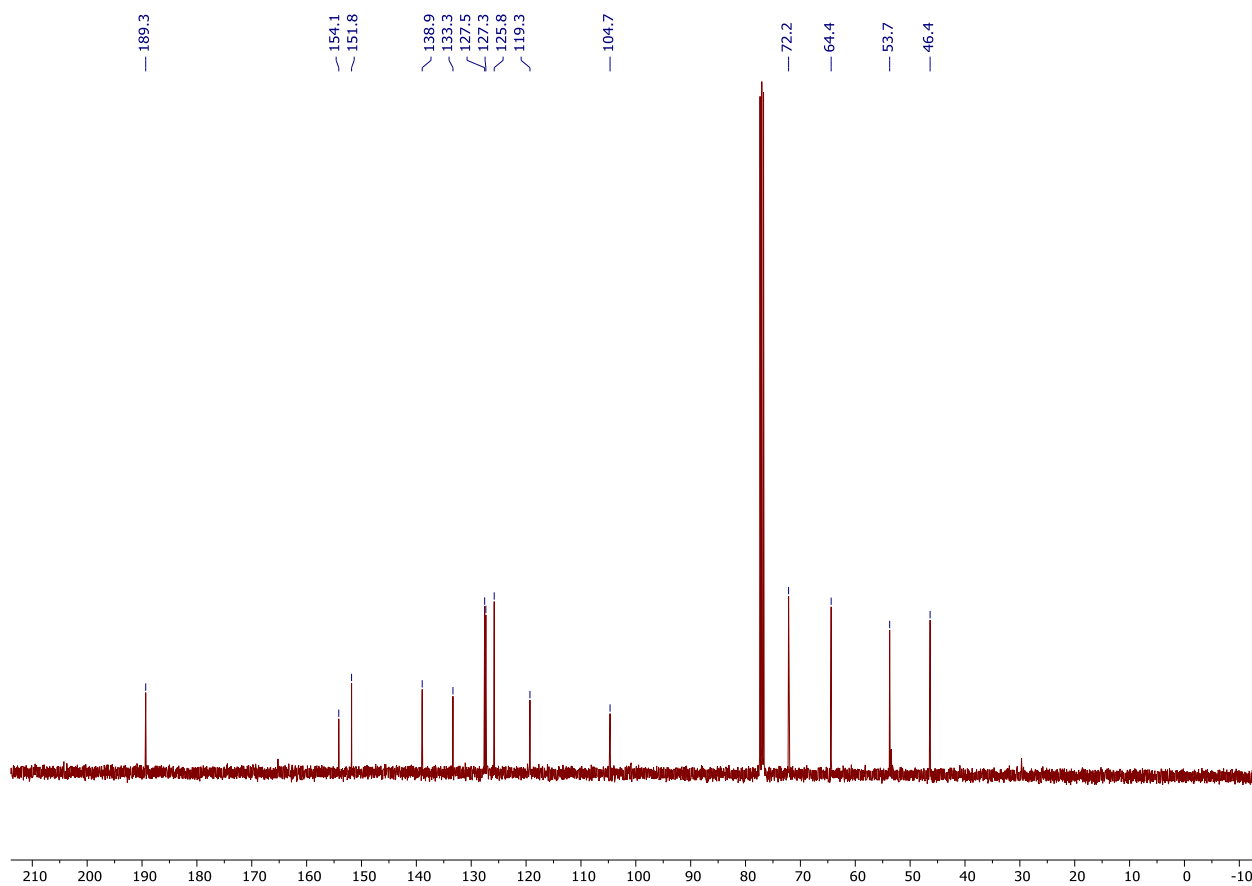

Copy of  $^1\text{H}$  (400.13 MHz,  $\text{CDCl}_3$ ) and  $^{13}\text{C}\{^1\text{H}\}$  (100.61 MHz,  $\text{CDCl}_3$ ) NMR spectrum of **4n**

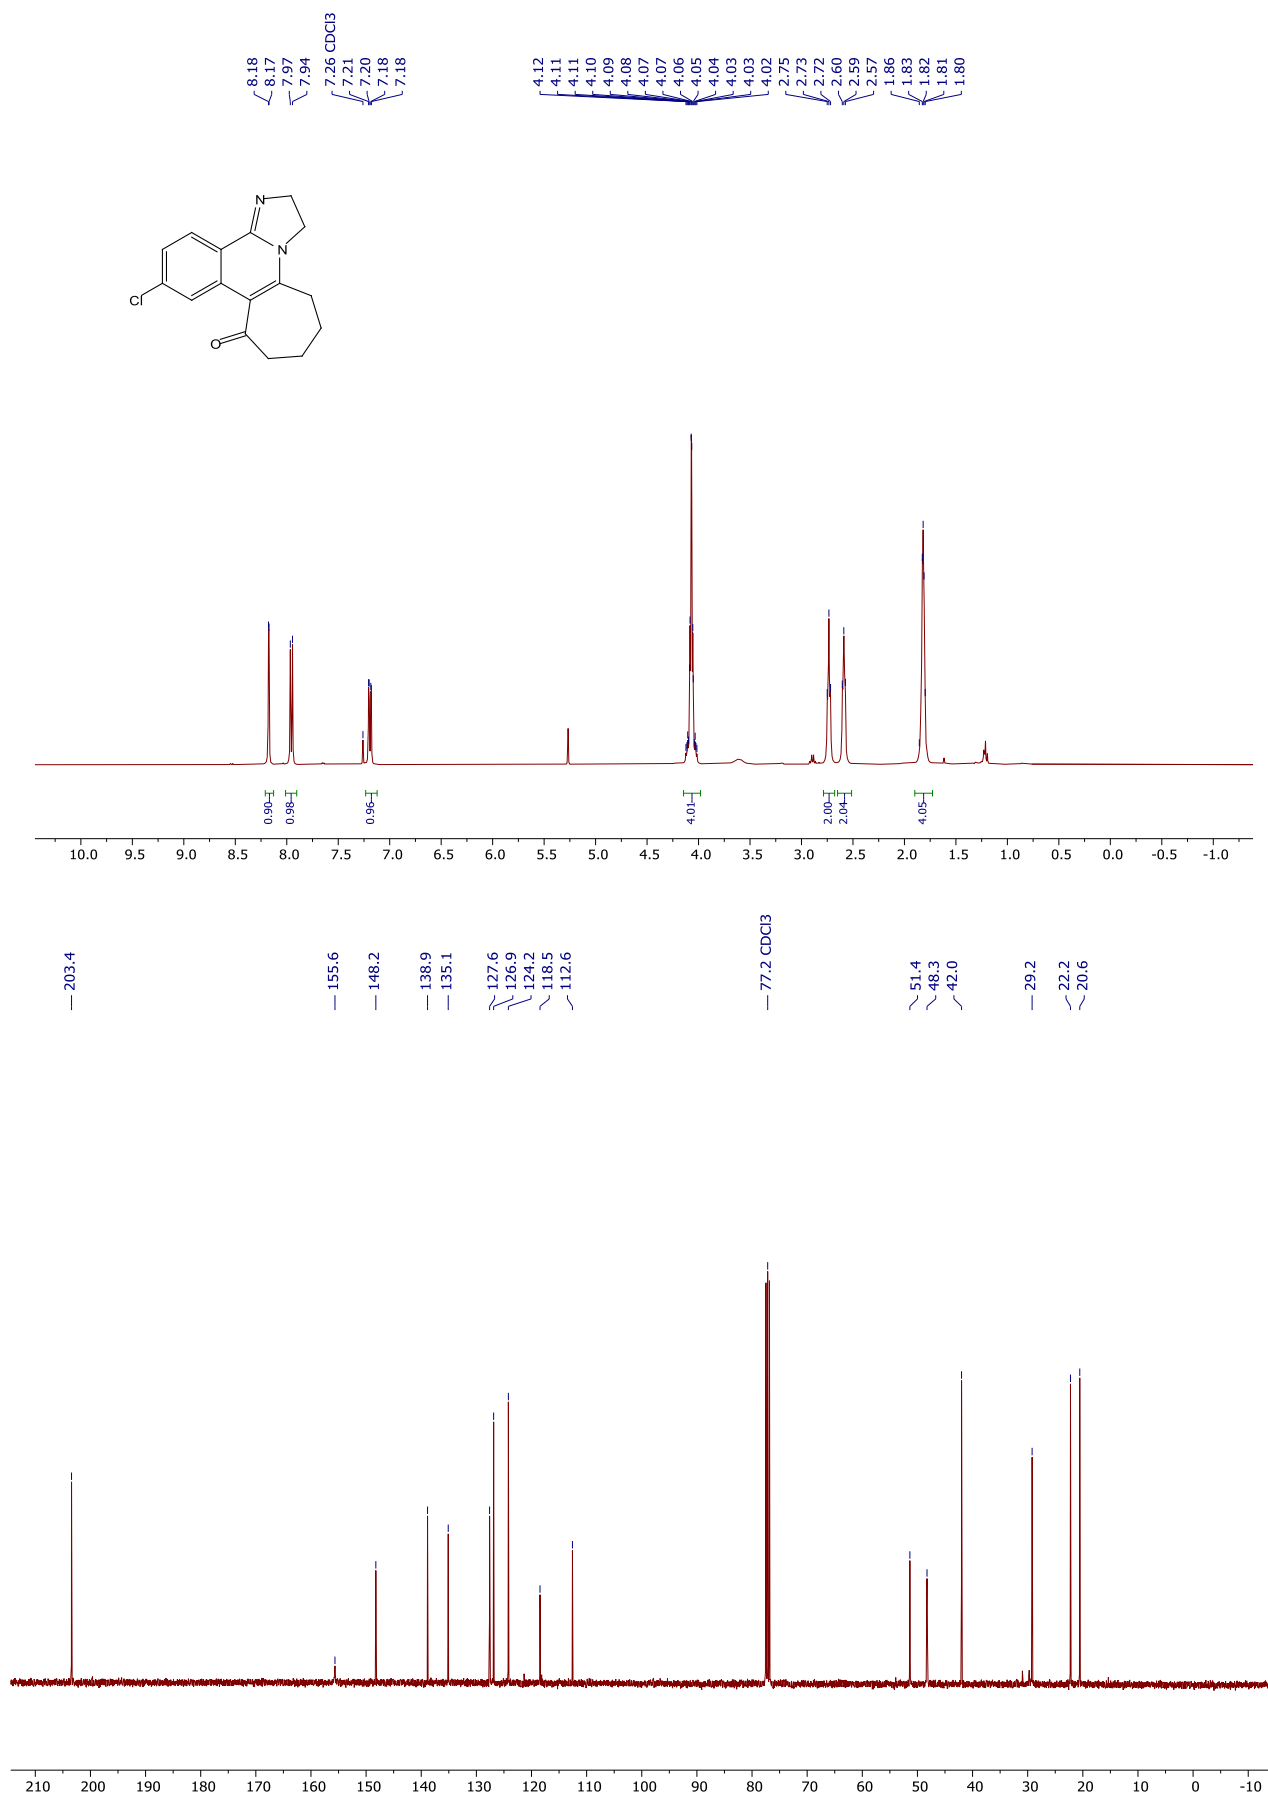

Copy of  $^1\text{H}$  (400.13 MHz,  $\text{DMSO-}d_6+\text{CDCl}_3$  in a ratio 1:6) NMR spectrum of **4o**

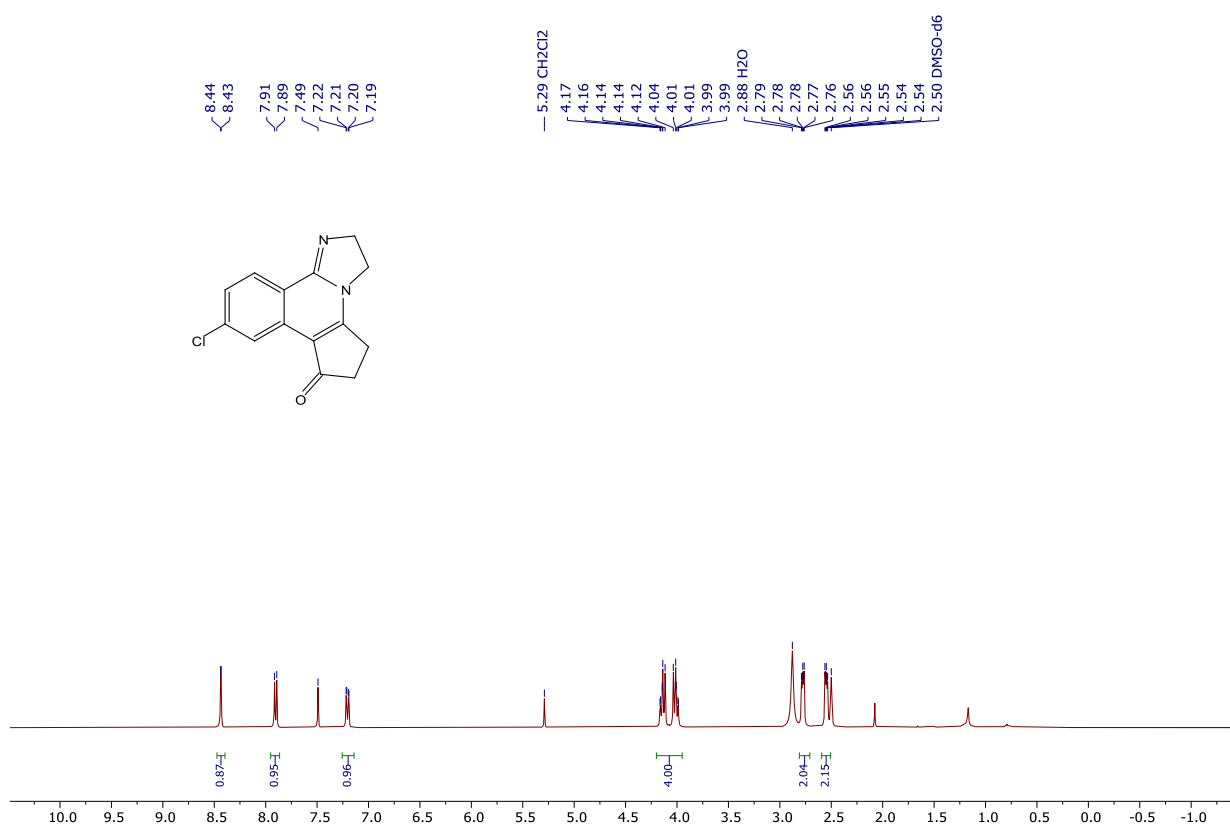

Copy of  $^{13}\text{C}\{^1\text{H}\}$  (100.61 MHz,  $\text{DMSO-}d_6+\text{CDCl}_3$  in a ratio 1:6) NMR spectrum of **4o**

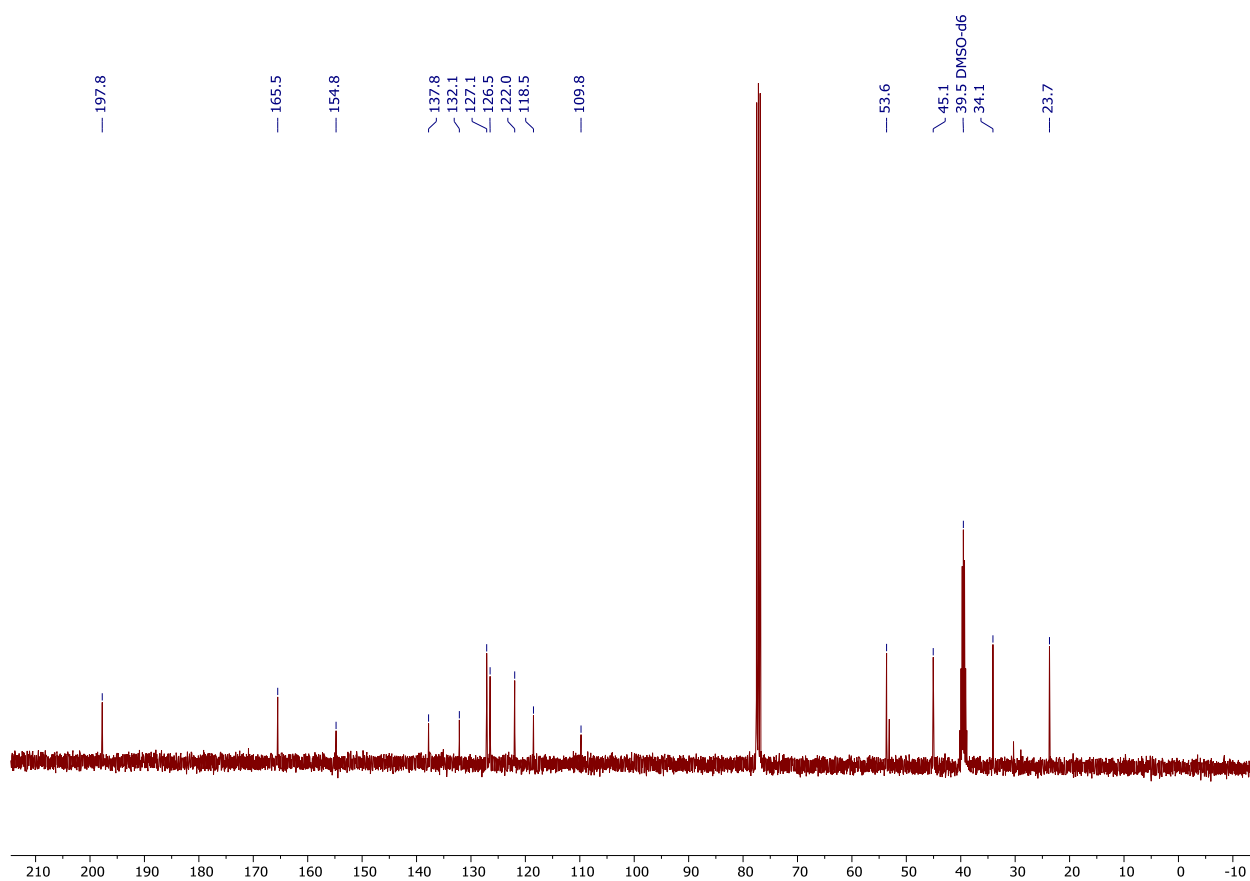

Copy of  $^1\text{H}$  (400.13 MHz,  $\text{CDCl}_3$ ) NMR spectrum of **4p**

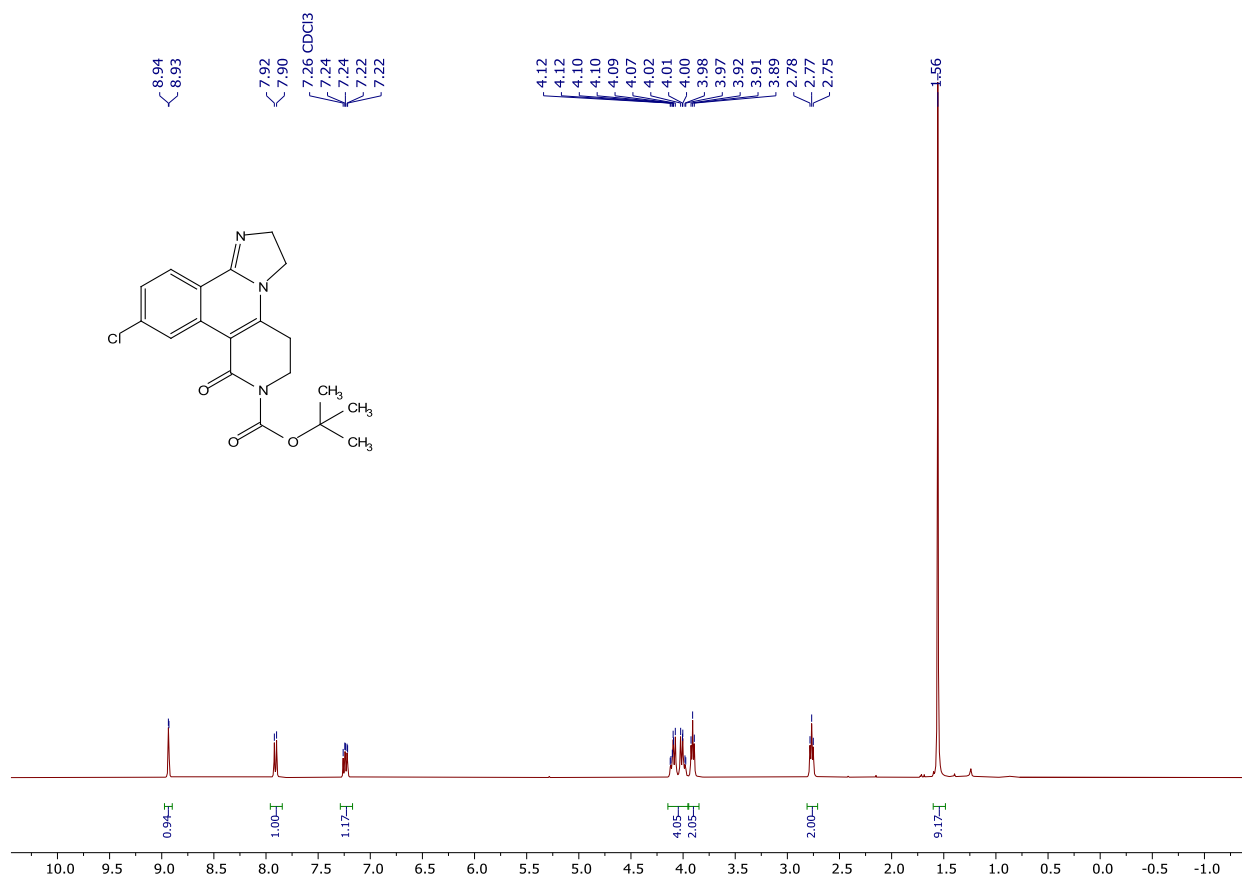

Copy of  $^{13}\text{C}\{^1\text{H}\}$  (100.61 MHz,  $\text{CDCl}_3$ ) NMR spectrum of **4p**

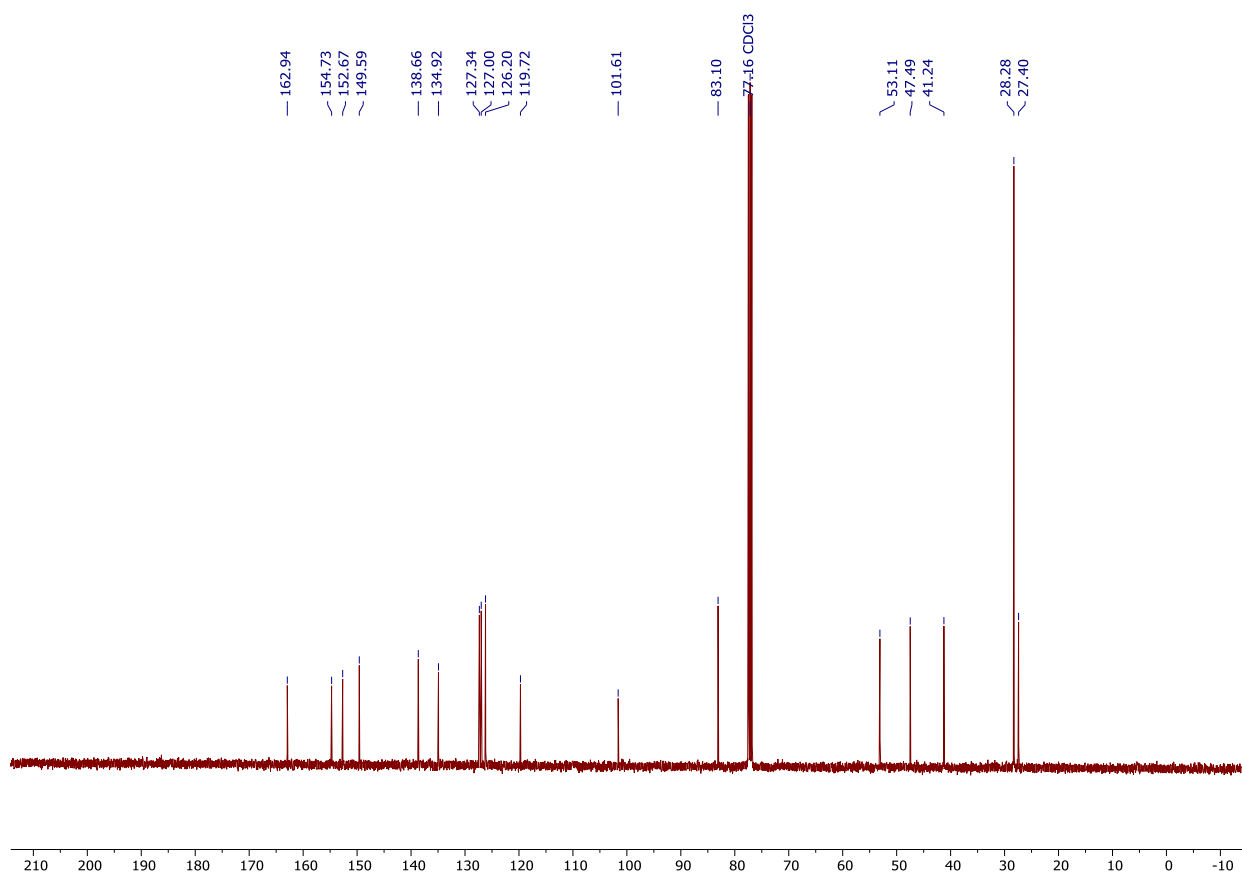

Copy of  $^1\text{H}$  (400.13 MHz,  $\text{CDCl}_3$ ) NMR spectrum of **4q**

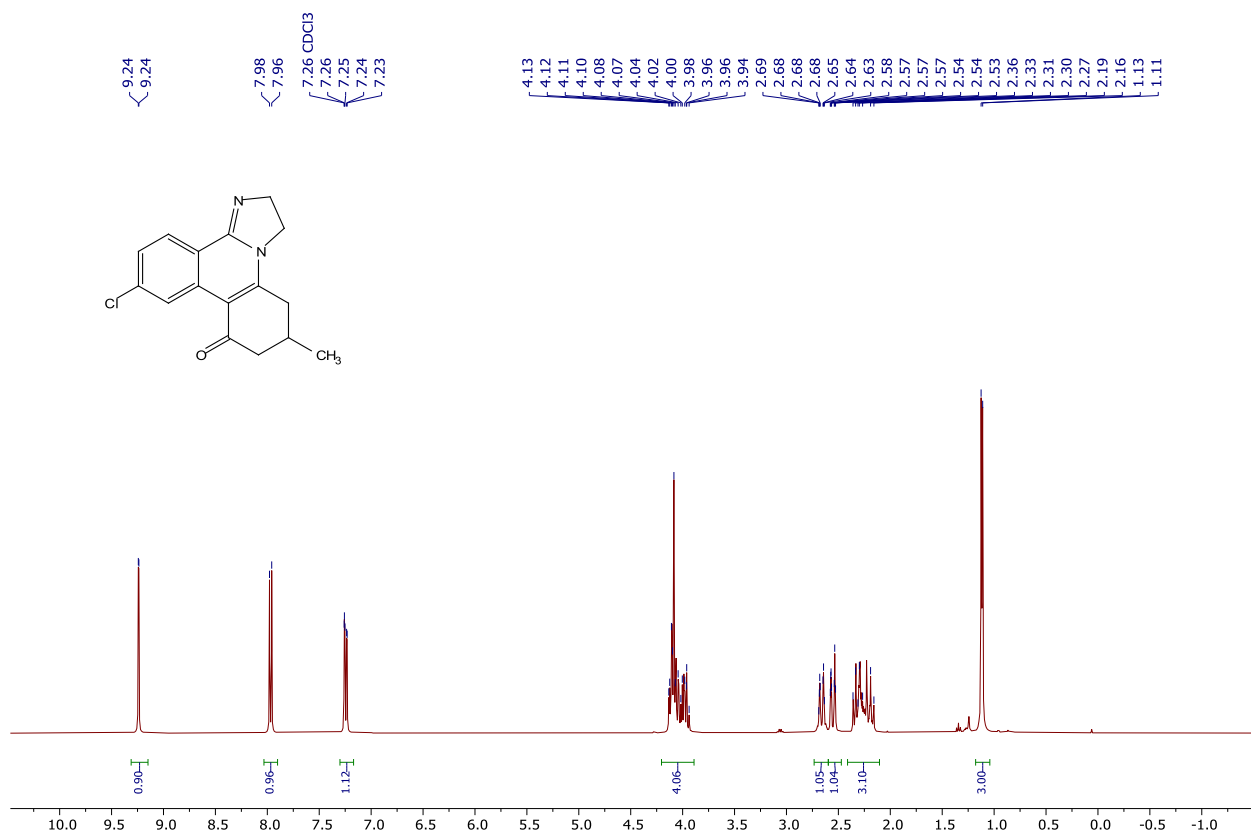

Copy of  $^{13}\text{C}\{^1\text{H}\}$  (100.61 MHz,  $\text{CDCl}_3$ ) NMR spectrum of **4q**

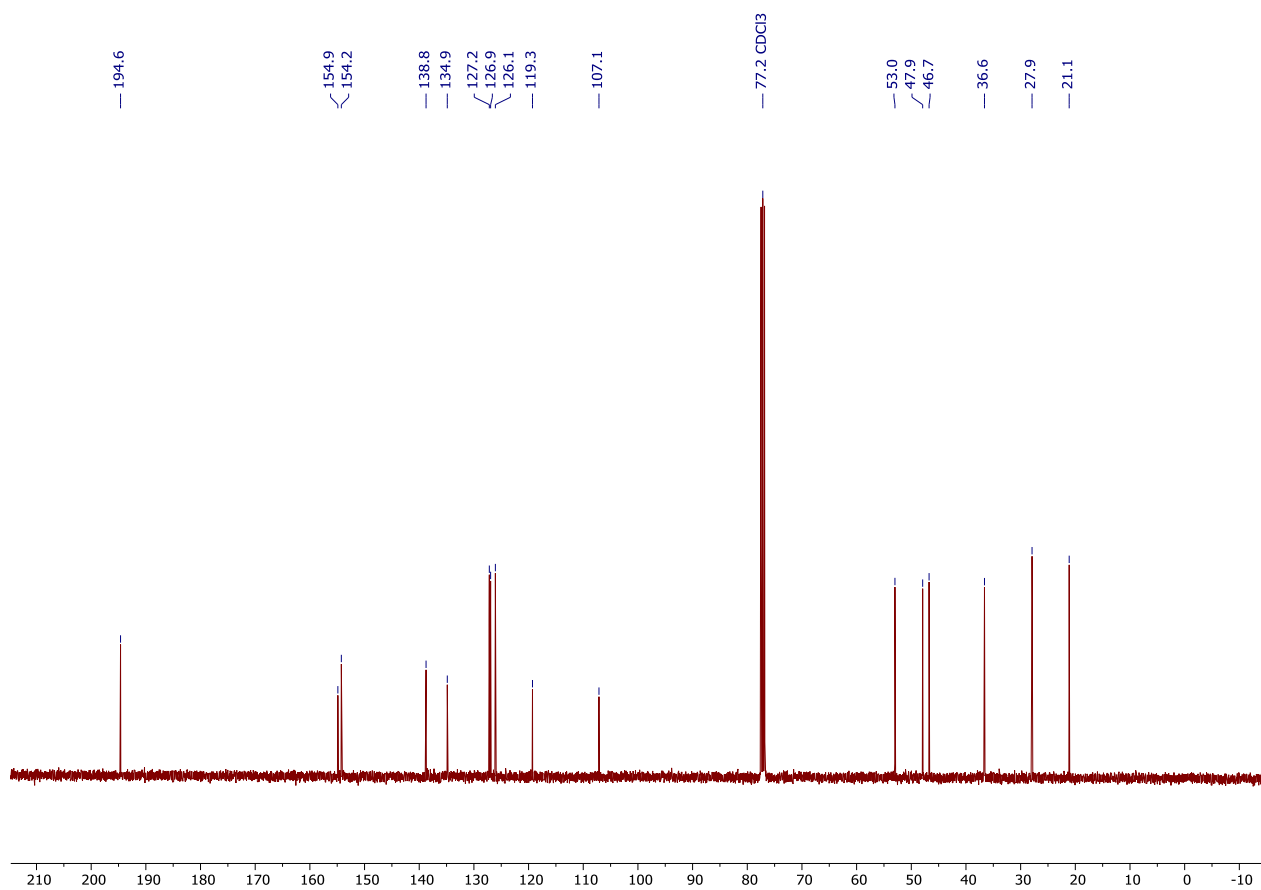

### 3. Crystallographic data for compounds 4a and 4f

X-ray single crystal analysis was performed on a SuperNova diffractometer. Crystals were kept at 100(2) K during data collection. Using Olex2<sup>4</sup>, the structures were solved with the SHELXT<sup>5</sup> structure solution program using intrinsic phasing and refined with the SHELXL<sup>6</sup> refinement package using least squares minimisation.

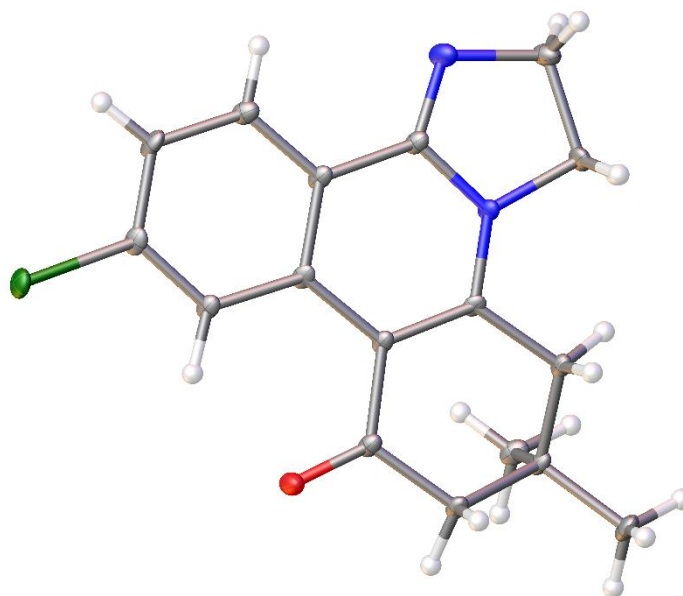

**Figure S2.** ORTEP representation of compound **4a** (thermal ellipsoids are shown at 50% probability).

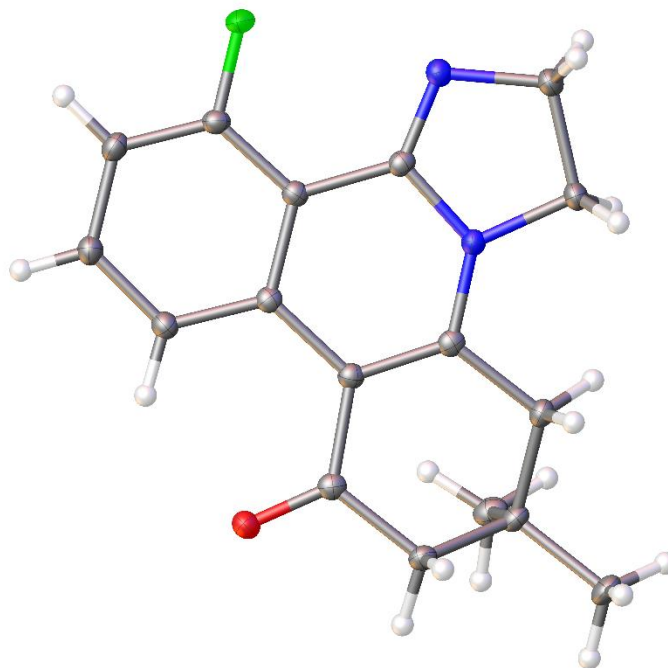

**Figure S3.** ORTEP representation of compound **4f** (thermal ellipsoids are shown at 50% probability).

| <b>Table S1.</b> Crystal data and structure refinement for <b>4a</b> and <b>4f</b> . |                                                            |                                                              |
|--------------------------------------------------------------------------------------|------------------------------------------------------------|--------------------------------------------------------------|
| <b>Compound number</b>                                                               | <b>4a</b>                                                  | <b>4f</b>                                                    |
| <b>CCDC</b>                                                                          | <b>2450071</b>                                             | <b>2502221</b>                                               |
| Empirical formula                                                                    | C <sub>17</sub> H <sub>17</sub> ClN <sub>2</sub> O         | C <sub>17</sub> H <sub>17</sub> FN <sub>2</sub> O            |
| Formula weight                                                                       | 300.77                                                     | 284.32                                                       |
| Temperature/K                                                                        | 99.9(2)                                                    | 100.15                                                       |
| Crystal system                                                                       | monoclinic                                                 | monoclinic                                                   |
| Space group                                                                          | <i>P</i> 2 <sub>1</sub> / <i>c</i>                         | <i>P</i> 2 <sub>1</sub> / <i>c</i>                           |
| <i>a</i> /Å                                                                          | 6.2845(2)                                                  | 8.24950(10)                                                  |
| <i>b</i> /Å                                                                          | 13.6733(3)                                                 | 13.9108(2)                                                   |
| <i>c</i> /Å                                                                          | 16.7189(4)                                                 | 12.9245(2)                                                   |
| $\alpha$ /°                                                                          | 90                                                         | 90                                                           |
| $\beta$ /°                                                                           | 91.028(2)                                                  | 106.252(2)                                                   |
| $\gamma$ /°                                                                          | 90                                                         | 90                                                           |
| Volume/Å <sup>3</sup>                                                                | 1436.42(7)                                                 | 1423.91(4)                                                   |
| <i>Z</i>                                                                             | 4                                                          | 4                                                            |
| $\rho_{\text{calc}}$ g/cm <sup>3</sup>                                               | 1.391                                                      | 1.326                                                        |
| $\mu$ /mm <sup>-1</sup>                                                              | 2.347                                                      | 0.755                                                        |
| F(000)                                                                               | 632.0                                                      | 600.0                                                        |
| Crystal size/mm <sup>3</sup>                                                         | 0.22 × 0.16 × 0.12                                         | 0.18 × 0.14 × 0.12                                           |
| Radiation                                                                            | Cu K $\alpha$ ( $\lambda$ = 1.54184)                       | CuK $\alpha$ ( $\lambda$ = 1.54184)                          |
| 2 $\Theta$ range for data collection/°                                               | 8.354 to 147.342                                           | 9.552 to 158.838                                             |
| Index ranges                                                                         | -6 ≤ <i>h</i> ≤ 7, -16 ≤ <i>k</i> ≤ 9, -20 ≤ <i>l</i> ≤ 18 | -10 ≤ <i>h</i> ≤ 9, -14 ≤ <i>k</i> ≤ 17, -13 ≤ <i>l</i> ≤ 16 |
| Reflections collected                                                                | 5289                                                       | 10502                                                        |

|                                                |                                                                  |                                                                  |
|------------------------------------------------|------------------------------------------------------------------|------------------------------------------------------------------|
| Independent reflections                        | 2804 [ $R_{\text{int}} = 0.0461$ , $R_{\text{sigma}} = 0.0453$ ] | 2974 [ $R_{\text{int}} = 0.0237$ , $R_{\text{sigma}} = 0.0243$ ] |
| Data/restraints/parameters                     | 2804/0/258                                                       | 2974/0/192                                                       |
| Goodness-of-fit on $F^2$                       | 1.057                                                            | 1.096                                                            |
| Final R indexes [ $I \geq 2\sigma(I)$ ]        | $R_1 = 0.0549$ , $wR_2 = 0.1460$                                 | $R_1 = 0.0442$ , $wR_2 = 0.1233$                                 |
| Final R indexes [all data]                     | $R_1 = 0.0583$ , $wR_2 = 0.1521$                                 | $R_1 = 0.0473$ , $wR_2 = 0.1257$                                 |
| Largest diff. peak/hole / $e \text{ \AA}^{-3}$ | 0.73/−0.79                                                       | 0.33/−0.29                                                       |

#### 4. References

- (1) White C., Yates A., Maitlis P., Heinekey D. ( $\eta^5$ -Pentamethylcyclopentadienyl)Rhodium and -Iridium Compounds. *Inorg. Synth.* 1992, 29, <https://doi.org/10.1002/9780470132609.ch53>
- (2) Fujioka H., Murai K., Ohba Y., Hiramatsu A., Kita Y. A mild and efficient one-pot synthesis of 2-dihydroimidazoles from aldehydes. *Tetrahedron Lett.* **2005**, 46, 2197–2199. [10.1016/j.tetlet.2005.02.025](https://doi.org/10.1016/j.tetlet.2005.02.025).
- (3) Dar'in D. et al. Diazo Tetramic Acids Provide Access to Natural-Like Spirocyclic  $\Delta \alpha, \beta$  -Butenolides through Rh(II)-Catalyzed O–H Insertion/Base-Promoted Cyclization // *J. Org. Chem.* **2024**, 89 (11), 7366–7375.
- (4) Dolomanov, O. V.; Bourhis, L. J.; Gildea, R. J.; Howard, J. A. K.; Puschmann, H. OLEX2: A Complete Structure Solution, Refinement and Analysis Program. *J. Appl. Crystallogr.* **2009**, 42 (2), 339–341. <https://doi.org/10.1107/S0021889808042726>.
- (5) Sheldrick, G. M. SHELXT - Integrated Space-Group and Crystal-Structure Determination. *Acta Crystallogr. Sect. A Found. Crystallogr.* **2015**, 71 (1), 3–8. <https://doi.org/10.1107/S2053273314026370>.
- (6) Sheldrick, G. M. Crystal Structure Refinement with SHELXL. *Acta Crystallogr. Sect. C Struct. Chem.* **2015**, 71 (Md), 3–8. <https://doi.org/10.1107/S2053229614024218>.
